# Supplementary material for: Periodic trends in trivalent actinide halides, phosphates, and arsenates
Source: Royal Society of Chemistry journal article supplement (doi:10.1039/d2dt02725a), 2023-01-01
Supplement: d2dt02725a1.pdf [file d2dt02725a1.pdf]

# **Periodic Trends in Trivalent Actinide Halides, Phosphates, and Arsenates**

Ashutosh Parimi<sup>†</sup>, Emmalee Mosher<sup>†</sup>, and Georg Schreckenbach\*

Department of Chemistry, University of Manitoba, Winnipeg, Manitoba, Canada R3T 2N2

Email: [schrecke@cc.umanitoba.ca](mailto:schrecke@cc.umanitoba.ca)

ORCID: 0000-0002-4614-0901 (GS)

ORCID: 0000-0003-3301-7995 (AP)

<sup>†</sup> *Authors contribute equally to this work*

## Table of Contents

|                                                                                                                           |           |
|---------------------------------------------------------------------------------------------------------------------------|-----------|
| <b>1. Bond lengths and bond angles obtained from the optimized geometries</b> .....                                       | <b>3</b>  |
| Table S1. An-X bond lengths obtained from optimized geometries using scalar ZORA relativistic method .....                | 3         |
| Table S2. Average of An-X bond lengths obtained from optimized geometries using spin-orbit ZORA relativistic method ..... | 3         |
| Table S3. Average of X-An-X bond angles obtained from optimized geometries .....                                          | 4         |
| <br>                                                                                                                      |           |
| <b>2. Hirshfeld, VDD, NEC charges on An atoms</b> .....                                                                   | <b>5</b>  |
| Table S4. Hirshfeld charges on An atom .....                                                                              | 5         |
| Table S5. Voronoi Deformation Density (VDD) charges on An atom .....                                                      | 5         |
| Table S6. Natural Electronic Charges (NEC) on An atom .....                                                               | 6         |
| <br>                                                                                                                      |           |
| <b>3. Wiberg Bond Indices</b> .....                                                                                       | <b>6</b>  |
| Table S7. Wiberg Bond Index (WBI) values for An-X & An-O (in phosphates and arsenates).....                               | 6         |
| <br>                                                                                                                      |           |
| <b>4. Natural Localized Molecular Orbitals (NLMO)</b> .....                                                               | <b>7</b>  |
| Figure S1. Percentage of 7s orbital contributions from NLMO towards the bonding orbitals .....                            | 7         |
| Figure S2. Percentage of 6d orbital contributions from NLMO towards the bonding orbitals .....                            | 8         |
| Figure S3. Percentage of 5f orbital contributions from NLMO towards the bonding orbitals .....                            | 9         |
| Figure S4. Percentage of 7p orbital contributions from NLMO towards the bonding orbitals .....                            | 10        |
| <br>                                                                                                                      |           |
| <b>5. Full reference for the Amsterdam Density Functional (ADF) software</b> .....                                        | <b>11</b> |
| <b>6. Electronic Configurations of An<sup>3+</sup> for Scalar Relativistic DFT</b> .....                                  | <b>12</b> |
| Table S8. Electronic Configurations of An <sup>3+</sup> for Scalar Relativistic DFT.....                                  | 12        |
| <b>7. Cartesian Coordinates and Frequencies of Optimized Geometries</b> .....                                             | <b>13</b> |

## 1. Bond lengths and bond angles obtained from the optimized geometries

Table S1. An-X bond lengths obtained from optimized geometries using scalar ZORA relativistic method (Å)

| <b>Atom</b> | <b>F</b> | <b>Cl</b> | <b>Br</b> | <b>I</b> | <b>At</b> | <b>AsO<sub>4</sub></b> | <b>PO<sub>4</sub></b> |
|-------------|----------|-----------|-----------|----------|-----------|------------------------|-----------------------|
| <b>Ac</b>   | 2.19     | 2.67      | 2.83      | 3.05     | 3.14      | 2.28                   | 2.27                  |
| <b>Th</b>   | 2.10     | 2.56      | 2.71      | 2.93     | 3.02      | -                      | 2.19                  |
| <b>Pa</b>   | 2.06     | 2.52      | 2.69      | 2.91     | 3.00      | -                      | 2.16                  |
| <b>U</b>    | 2.06     | 2.51      | 2.68      | 2.90     | 2.99      | 2.17                   | 2.16                  |
| <b>Np</b>   | 2.06     | 2.51      | 2.68      | 2.89     | 2.99      | 2.16                   | 2.16                  |
| <b>Pu</b>   | 2.06     | 2.51      | 2.67      | 2.89     | 2.99      | 2.16                   | 2.16                  |
| <b>Am</b>   | 2.07     | 2.52      | 2.68      | 2.92     | 3.02      | 2.17                   | 2.18                  |
| <b>Cm</b>   | 2.06     | 2.49      | 2.64      | 2.87     | 2.96      | 2.16                   | 2.16                  |
| <b>Bk</b>   | 2.05     | 2.47      | 2.63      | 2.86     | 2.96      | 2.15                   | 2.15                  |
| <b>Cf</b>   | 2.05     | 2.46      | 2.63      | 2.88     | 2.97      | 2.16                   | 2.15                  |
| <b>Es</b>   | 2.05     | 2.47      | 2.63      | 2.88     | 2.98      | 2.16                   | 2.17                  |
| <b>Fm</b>   | 2.04     | 2.49      | 2.65      | 2.91     | 3.01      | 2.17                   | 2.19                  |
| <b>Md</b>   | 2.07     | 2.51      | 2.68      | 2.92     | 3.02      | 2.23                   | 2.31                  |
| <b>No</b>   | -        | 2.55      | 2.72      | 2.95     | 3.05      | 2.29                   | 2.31                  |
| <b>Lr</b>   | 2.02     | 2.43      | 2.59      | 2.81     | 2.91      | 2.12                   | 2.11                  |

Table S2. Average of An-X bond lengths obtained from optimized geometries using spin-orbit ZORA relativistic method (Å)

| <b>Atom</b> | <b>F</b> | <b>Cl</b> | <b>Br</b> | <b>I</b> | <b>At</b> | <b>AsO<sub>4</sub></b> | <b>PO<sub>4</sub></b> |
|-------------|----------|-----------|-----------|----------|-----------|------------------------|-----------------------|
| <b>Ac</b>   | 2.19     | 2.66      | 2.83      | 3.05     | 3.17      | 2.28                   | 2.27                  |
| <b>Th</b>   | 2.10     | 2.56      | 2.71      | 2.94     | 3.05      |                        | 2.18                  |
| <b>Pa</b>   | 2.06     | 2.52      | 2.69      | 2.91     | 3.03      |                        | 2.17                  |
| <b>U</b>    | 2.06     | 2.51      | 2.68      | 2.90     | 3.02      | 2.17                   | 2.16                  |

|           |      |      |      |      |      |       |      |
|-----------|------|------|------|------|------|-------|------|
| <b>Np</b> | 2.06 | 2.51 | 2.67 | 2.89 | 3.02 | 2.163 | 2.16 |
| <b>Pu</b> | 2.07 | 2.50 | 2.66 | 2.89 | 3.01 | 2.16  | 2.16 |
| <b>Am</b> | 2.07 | 2.51 | 2.67 | 2.91 | 3.04 | 2.17  | 2.18 |
| <b>Cm</b> | 2.06 | 2.48 | 2.64 | 2.86 | 2.98 | 2.18  | 2.15 |
| <b>Bk</b> | 2.04 | 2.47 | 2.63 | 2.86 | 2.98 | 2.14  | 2.14 |
| <b>Cf</b> | 2.04 | 2.47 | 2.64 | 2.87 | 3.01 | 2.15  | 2.14 |
| <b>Es</b> | 2.05 | 2.47 | 2.64 | 2.87 | 3.02 | 2.16  | 2.15 |
| <b>Fm</b> | 2.04 | 2.48 | 2.64 | 2.90 | 3.03 | 2.17  | 2.16 |
| <b>Md</b> | 2.05 | 2.50 | 2.67 | 2.91 | 3.04 | 2.20  | 2.19 |
| <b>No</b> |      | 2.53 | 2.69 | 2.94 | 3.08 | 2.26  | 2.23 |
| <b>Lr</b> | 2.02 | 2.43 | 2.58 | 2.80 | 2.92 | 2.12  | 2.10 |

Table S3. Average of X-An-X bond angles obtained from optimized geometries (in degrees)

|           | <b>F-An-F</b> | <b>Cl-An-Cl</b> | <b>Br-An-Br</b> | <b>I-An-I</b> | <b>At-An-At</b> | <b>O-An-O (in AnPO<sub>4</sub>)</b> | <b>O-An-O (in AnAsO<sub>4</sub>)</b> |
|-----------|---------------|-----------------|-----------------|---------------|-----------------|-------------------------------------|--------------------------------------|
| <b>Ac</b> | 112.9         | 112.9           | 113.7           | 116.4         | 114.1           | 95.9                                | 69.4                                 |
| <b>Th</b> | 119.9         | 119.8           | 120.0           | 120.0         | 119.9           | 66.4                                | -                                    |
| <b>Pa</b> | 106.4         | 111.7           | 114.0           | 115.7         | 115.6           | 67.5                                | -                                    |
| <b>U</b>  | 102.7         | 106.1           | 108.6           | 109.9         | 108.9           | 67.6                                | 72.5                                 |
| <b>Np</b> | 102.2         | 106.7           | 108.4           | 107.3         | 107.0           | 67.7                                | 72.5                                 |
| <b>Pu</b> | 106.0         | 110.0           | 112.3           | 113.4         | 111.6           | 67.6                                | 72.2                                 |
| <b>Am</b> | 106.2         | 109.5           | 115.1           | 118.2         | 119.4           | 67.2                                | 72.2                                 |
| <b>Cm</b> | 105.6         | 108.6           | 110.8           | 114.1         | 111.9           | 68.4                                | 73.1                                 |
| <b>Bk</b> | 105.0         | 107.7           | 109.3           | 114.6         | 114.1           | 68.9                                | 73.8                                 |
| <b>Cf</b> | 109.2         | 104.8           | 106.2           | 117.5         | 114.4           | 65.3                                | 73.0                                 |
| <b>Es</b> | 112.8         | 109.0           | 90.0            | 118.7         | 117.8           | 67.6                                | 72.9                                 |
| <b>Fm</b> | 105.3         | 108.8           | 108.9           | 119.4         | 119.8           | 66.9                                | 72.1                                 |
| <b>Md</b> | 119.9         | 119.9           | 117.4           | 115.5         | 113.6           | 64.5                                | 69.7                                 |
| <b>No</b> | -             | 119.4           | 119.7           | 119.9         | 119.9           | 65.6                                | 71.6                                 |
| <b>Lr</b> | 109.3         | 112.7           | 115.4           | 118.5         | 119.3           | 70.7                                | 75.6                                 |

## 2. Hirshfeld, VDD, NEC charges on An atoms

Table S4. Hirshfeld charges on An atom

| Series    | F    | Cl   | Br   | I    | At   | PO <sub>4</sub> | AsO <sub>4</sub> |
|-----------|------|------|------|------|------|-----------------|------------------|
| <b>Ac</b> | 1.32 | 0.87 | 0.81 | 0.72 | 0.64 | 1.05            | 0.98             |
| <b>Th</b> | 0.78 | 0.56 | 0.48 | 0.39 | 0.33 | 0.77            | -                |
| <b>Pa</b> | 0.80 | 0.63 | 0.58 | 0.50 | 0.44 | 0.82            | -                |
| <b>U</b>  | 0.81 | 0.64 | 0.59 | 0.52 | 0.46 | 0.84            | 0.77             |
| <b>Np</b> | 0.83 | 0.64 | 0.59 | 0.53 | 0.47 | 0.86            | 0.78             |
| <b>Pu</b> | 0.95 | 0.76 | 0.71 | 0.61 | 0.54 | 0.96            | 0.89             |
| <b>Am</b> | 0.98 | 0.78 | 0.69 | 0.60 | 0.53 | 0.96            | 0.90             |
| <b>Cm</b> | 0.92 | 0.70 | 0.63 | 0.56 | 0.49 | 0.90            | 0.84             |
| <b>Bk</b> | 1.01 | 0.79 | 0.73 | 0.64 | 0.58 | 0.74            | 0.91             |
| <b>Cf</b> | 1.01 | 0.75 | 0.68 | 0.63 | 0.54 | 0.90            | 0.89             |
| <b>Es</b> | 1.03 | 0.75 | 0.70 | 0.60 | 0.53 | 0.81            | 0.87             |
| <b>Fm</b> | 0.99 | 0.71 | 0.63 | 0.57 | 0.49 | 0.86            | 0.83             |
| <b>Md</b> | 1.00 | 0.71 | 0.62 | 0.51 | 0.45 | 0.13            | 0.85             |
| <b>No</b> | -    | 0.70 | 0.62 | 0.52 | 0.47 | 0.88            | 0.82             |
| <b>Lr</b> | 1.00 | 0.75 | 0.68 | 0.60 | 0.54 | 0.98            | 0.91             |

Table S5. Voronoi Deformation Density (VDD) charges on An atom

| Series    | F    | Cl   | Br   | I    | At   | PO <sub>4</sub> | AsO <sub>4</sub> |
|-----------|------|------|------|------|------|-----------------|------------------|
| <b>Ac</b> | 0.95 | 0.72 | 0.76 | 0.76 | 0.71 | 0.82            | 0.77             |
| <b>Th</b> | 0.24 | 0.44 | 0.47 | 0.45 | 0.41 | 0.58            | -                |
| <b>Pa</b> | 0.41 | 0.56 | 0.58 | 0.55 | 0.51 | 0.64            | -                |
| <b>U</b>  | 0.44 | 0.58 | 0.61 | 0.59 | 0.54 | 0.64            | 0.60             |
| <b>Np</b> | 0.44 | 0.59 | 0.60 | 0.60 | 0.56 | 0.64            | 0.60             |
| <b>Pu</b> | 0.64 | 0.73 | 0.74 | 0.67 | 0.61 | 0.82            | 0.77             |
| <b>Am</b> | 0.67 | 0.74 | 0.72 | 0.66 | 0.61 | 0.83            | 0.79             |
| <b>Cm</b> | 0.54 | 0.65 | 0.67 | 0.63 | 0.58 | 0.75            | 0.70             |
| <b>Bk</b> | 0.74 | 0.79 | 0.78 | 0.71 | 0.65 | 0.59            | 0.83             |
| <b>Cf</b> | 0.74 | 0.76 | 0.74 | 0.69 | 0.62 | 0.78            | 0.81             |

|           |      |      |      |      |      |      |      |
|-----------|------|------|------|------|------|------|------|
| <b>Es</b> | 0.76 | 0.75 | 0.76 | 0.67 | 0.60 | 0.69 | 0.79 |
| <b>Fm</b> | 0.76 | 0.71 | 0.68 | 0.64 | 0.56 | 0.74 | 0.75 |
| <b>Md</b> | 0.73 | 0.69 | 0.65 | 0.57 | 0.52 | 0.90 | 0.77 |
| <b>No</b> | -    | 0.69 | 0.66 | 0.60 | 0.55 | 0.78 | 0.74 |
| <b>Lr</b> | 0.71 | 0.76 | 0.75 | 0.70 | 0.64 | 0.89 | 0.83 |

Table S6. Natural Electronic Charges (NEC) on An atom

| <b>Series</b> | <b>F</b> | <b>Cl</b> | <b>Br</b> | <b>I</b> | <b>At</b> | <b>PO<sub>4</sub></b> | <b>AsO<sub>4</sub></b> |
|---------------|----------|-----------|-----------|----------|-----------|-----------------------|------------------------|
| <b>Ac</b>     | 2.41     | 1.73      | 1.59      | 1.41     | 1.31      | 2.02                  | 2.00                   |
| <b>Th</b>     | 1.92     | 1.24      | 1.08      | 0.85     | 0.77      | 1.69                  | -                      |
| <b>Pa</b>     | 1.79     | 1.22      | 1.13      | 0.96     | 0.89      | 1.59                  | -                      |
| <b>U</b>      | 1.83     | 1.21      | 1.11      | 0.94     | 0.86      | 1.66                  | 1.62                   |
| <b>Np</b>     | 1.85     | 1.28      | 1.18      | 1.03     | 0.96      | 1.70                  | 1.66                   |
| <b>Pu</b>     | 1.93     | 1.38      | 1.30      | 1.08     | 0.99      | 1.72                  | 1.69                   |
| <b>Am</b>     | 1.98     | 1.46      | 1.32      | 1.15     | 1.09      | 1.73                  | 1.72                   |
| <b>Cm</b>     | 2.05     | 1.49      | 1.37      | 1.18     | 1.08      | 1.80                  | 1.78                   |
| <b>Bk</b>     | 2.02     | 1.45      | 1.33      | 1.15     | 1.07      | 1.45                  | 1.73                   |
| <b>Cf</b>     | 2.04     | 1.37      | 1.25      | 1.14     | 1.05      | 1.64                  | 1.70                   |
| <b>Es</b>     | 2.05     | 1.41      | 1.27      | 1.13     | 1.05      | 1.54                  | 1.67                   |
| <b>Fm</b>     | 1.99     | 1.37      | 1.22      | 1.09     | 1.04      | 1.58                  | 1.62                   |
| <b>Md</b>     | 2.01     | 1.41      | 1.25      | 1.04     | 0.97      | 0.65                  | 1.60                   |
| <b>No</b>     | -        | 1.42      | 1.27      | 1.08     | 1.02      | 1.60                  | 1.59                   |
| <b>Lr</b>     | 2.22     | 1.62      | 1.47      | 1.24     | 1.15      | 1.97                  | 1.95                   |

### 3. Wiberg Bond Indices

Table S7. Wiberg Bond Index (WBI) values for An-X & An-O (in phosphates and arsenates)

| <b>Series</b> | <b>F</b> | <b>Cl</b> | <b>Br</b> | <b>I</b> | <b>At</b> | <b>PO<sub>4</sub></b> | <b>AsO<sub>4</sub></b> |
|---------------|----------|-----------|-----------|----------|-----------|-----------------------|------------------------|
| <b>Ac</b>     | 0.37     | 0.76      | 0.83      | 0.91     | 0.96      | 0.55                  | 0.57                   |
| <b>Th</b>     | 0.66     | 1.02      | 1.09      | 1.18     | 1.22      | 0.74                  | -                      |

|           |      |      |      |      |      |      |      |
|-----------|------|------|------|------|------|------|------|
| <b>Pa</b> | 0.74 | 1.04 | 1.08 | 1.14 | 1.17 | 0.79 | -    |
| <b>U</b>  | 0.72 | 1.05 | 1.09 | 1.17 | 1.20 | 0.75 | 0.78 |
| <b>Np</b> | 0.71 | 1.01 | 1.06 | 1.11 | 1.14 | 0.74 | 0.77 |
| <b>Pu</b> | 0.65 | 0.93 | 0.99 | 1.06 | 1.09 | 0.71 | 0.74 |
| <b>Am</b> | 0.63 | 0.89 | 0.94 | 0.98 | 0.98 | 0.68 | 0.65 |
| <b>Cm</b> | 0.59 | 0.89 | 0.94 | 1.02 | 1.07 | 0.67 | 0.69 |
| <b>Bk</b> | 0.60 | 0.91 | 0.96 | 1.04 | 1.08 | 0.54 | 0.71 |
| <b>Cf</b> | 0.57 | 0.95 | 0.99 | 1.01 | 1.04 | 0.63 | 0.72 |
| <b>Es</b> | 0.58 | 0.93 | 0.92 | 0.98 | 1.02 | 0.53 | 0.71 |
| <b>Fm</b> | 0.60 | 0.93 | 0.99 | 1.00 | 0.95 | 0.64 | 0.71 |
| <b>Md</b> | 0.51 | 0.77 | 0.81 | 0.84 | 0.84 | -    | 0.59 |
| <b>No</b> | -    | 0.62 | 0.62 | 0.63 | 0.62 | 0.27 | 0.30 |
| <b>Lr</b> | 0.48 | 0.80 | 0.86 | 0.95 | 0.97 | 0.56 | 0.58 |

#### 4. Natural Localized Molecular Orbitals (NLMO) Results

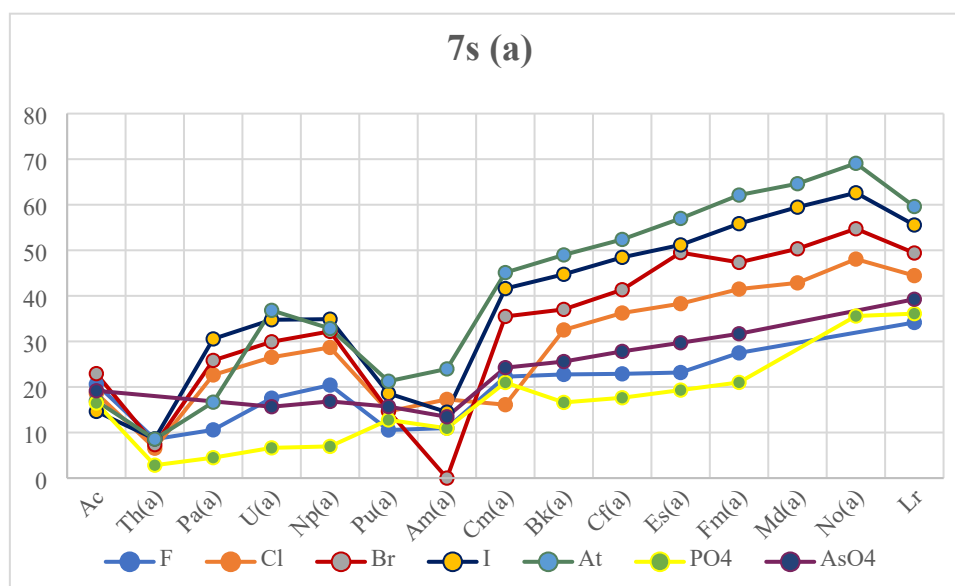

(a) denotes alpha spin contributions

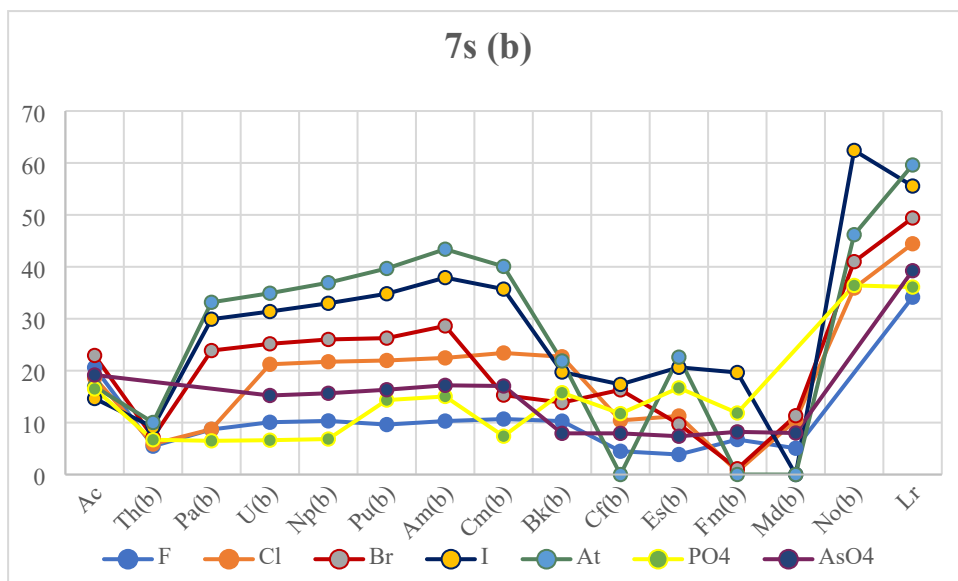

(b) denotes beta spin contributions

Figure S1. Percentage of average 7s orbital contributions from NLMO towards the bonding orbitals

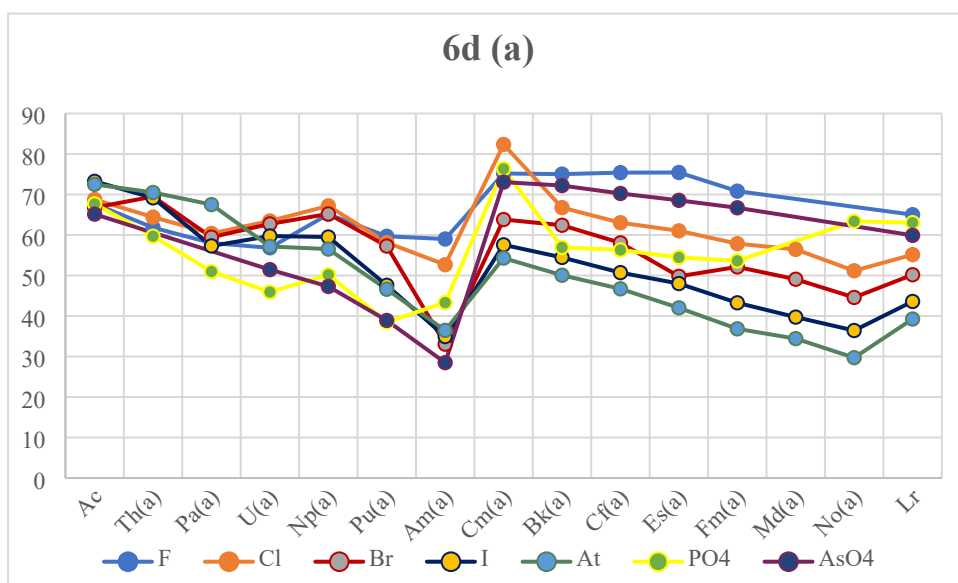

(a) denotes alpha spin contributions



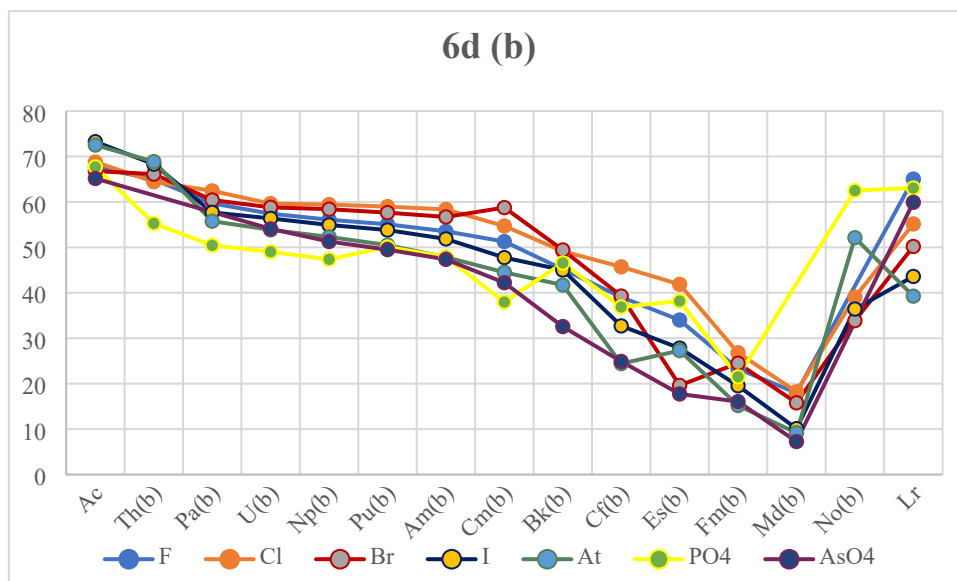

(b) denotes beta spin contributions

Figure S2. Percentage of average 6d orbital contributions from NLMO towards the bonding orbitals

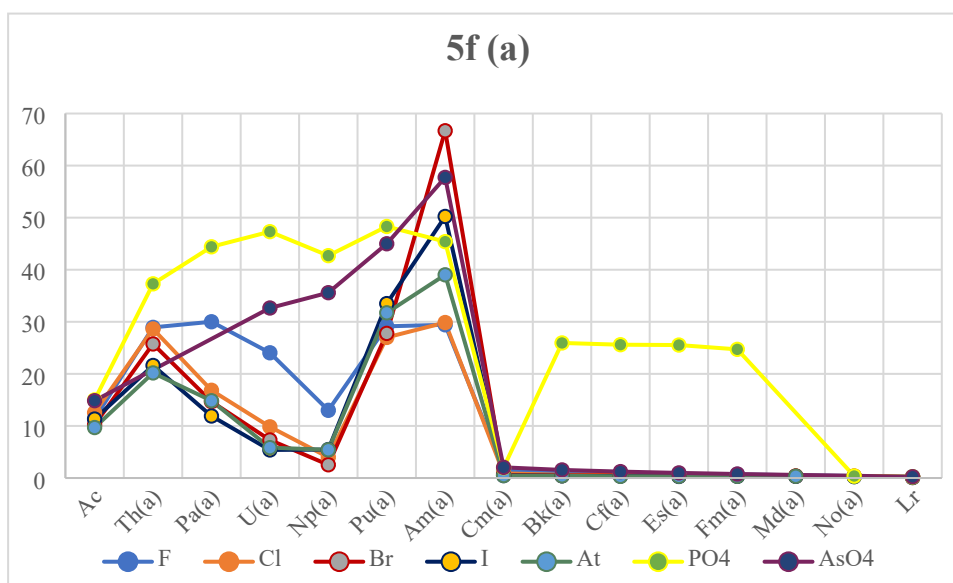

(a) denotes alpha spin contributions

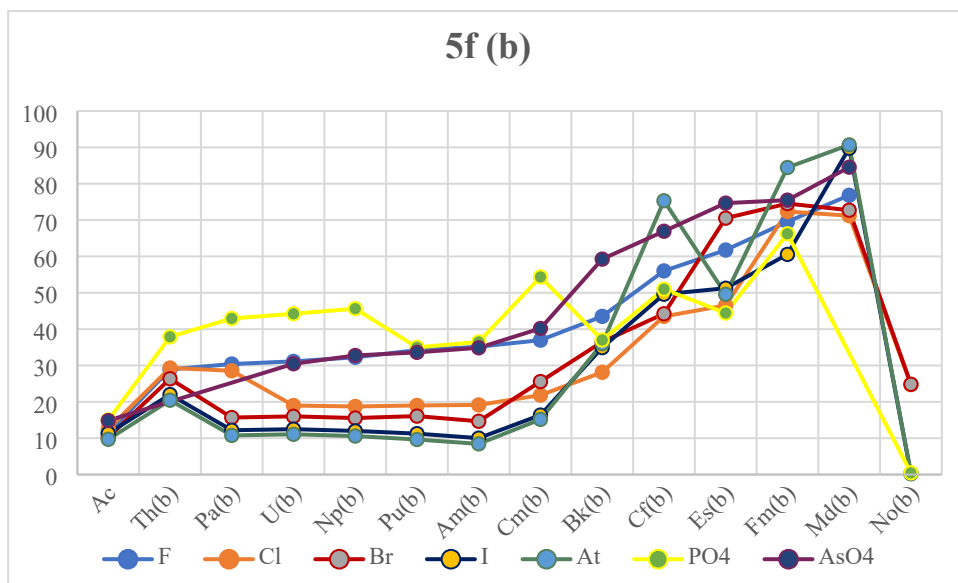

(b) denotes beta spin contributions

Figure S3. Percentage of average 5f orbital contributions from NLMO towards the bonding orbitals

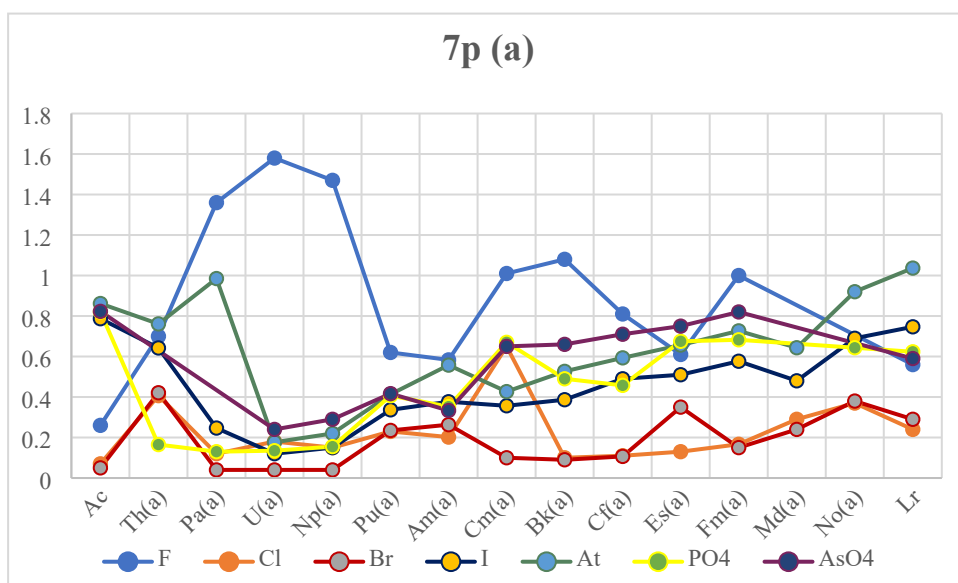

(a) denotes alpha spin contributions

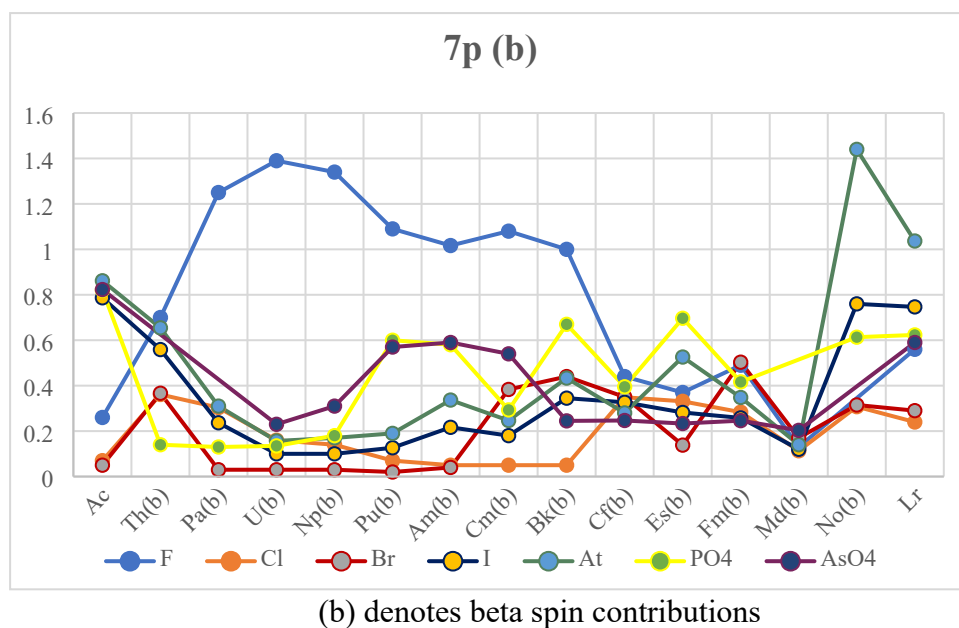

Figure S4. Percentage of average 7p orbital contributions from NLMO towards the bonding orbitals

## 5. Full reference for the Amsterdam Density Functional (ADF) software

ADF2017, SCM, Theoretical Chemistry, Vrije Universiteit, Amsterdam, The Netherlands, <http://www.scm.com>.

E.J. Baerends, T. Ziegler, A.J. Atkins, J. Autschbach, O. Baseggio, D. Bashford, A. Bérces, F.M. Bickelhaupt, C. Bo, P.M. Boerrigter, L. Cavallo, C. Daul, D.P. Chong, D.V. Chulhai, L. Deng, R.M. Dickson, J.M. Dieterich, D.E. Ellis, M. van Faassen, L. Fan, T.H. Fischer, C. Fonseca Guerra, M. Franchini, A. Ghysels, A. Giammona, S.J.A. van Gisbergen, A. Goetz, A.W. Götz, J.A. Groeneveld, O.V. Gritsenko, M. Grüning, S. Gusarov, F.E. Harris, P. van den Hoek, Z. Hu, C.R. Jacob, H. Jacobsen, L. Jensen, L. Joubert, J.W. Kaminski, G. van Kessel, C. König, F. Kootstra, A. Kovalenko, M.V. Krykunov, E. van Lenthe, D.A. McCormack, A. Michalak, M. Mitoraj, S.M. Morton, J. Neugebauer, V.P. Nicu, L. Noodleman, V.P. Osinga, S. Patchkovskii, M. Pavanello, C.A. Peeples, P.H.T. Philipsen, D. Post, C.C. Pye, H. Ramanantoanina, P. Ramos, W. Ravenek, J.I. Rodríguez, P. Ros, R. Rüger, P.R.T. Schipper, D. Schlüns, H. van Schoot, G. Schreckenbach, J.S. Seldenthuis, M. Seth, J.G. Snijders, M. Solà, M. Stener, M. Swart, D. Swerhone, V. Tognetti, G. te Velde, P. Vernooijs, L. Versluis, L. Visscher, O. Visser, F. Wang, T.A. Wesolowski, E.M. van Wezenbeek, G. Wiesenekker, S.K. Wolff, T.K. Woo, A.L. Yakovlev

## 6. Electronic Configurations of An<sup>3+</sup> for Scalar Relativistic DFT

Table S8. Electronic Configurations of An<sup>3+</sup> for Scalar Relativistic DFT

| An | G.S. Configuration                                    | An <sup>3+</sup> Configuration |
|----|-------------------------------------------------------|--------------------------------|
| Ac | [Rn] 7s <sup>2</sup> 6d <sup>1</sup>                  | [Rn]                           |
| Th | [Rn] 7s <sup>2</sup> 6d <sup>2</sup>                  | [Rn] 6d <sup>1</sup>           |
| Pa | [Rn] 7s <sup>2</sup> 5f <sup>2</sup> 6d <sup>1</sup>  | [Rn] 5f <sup>2</sup>           |
| U  | [Rn] 7s <sup>2</sup> 5f <sup>3</sup> 6d <sup>1</sup>  | [Rn] 5f <sup>3</sup>           |
| Np | [Rn] 7s <sup>2</sup> 5f <sup>4</sup> 6d <sup>1</sup>  | [Rn] 5f <sup>4</sup>           |
| Pu | [Rn] 7s <sup>2</sup> 5f <sup>6</sup>                  | [Rn] 5f <sup>5</sup>           |
| Am | [Rn] 7s <sup>2</sup> 5f <sup>7</sup>                  | [Rn] 5f <sup>6</sup>           |
| Cm | [Rn] 7s <sup>2</sup> 5f <sup>7</sup> 6d <sup>1</sup>  | [Rn] 5f <sup>7</sup>           |
| Bk | [Rn] 7s <sup>2</sup> 5f <sup>9</sup>                  | [Rn] 5f <sup>8</sup>           |
| Cf | [Rn] 7s <sup>2</sup> 5f <sup>10</sup>                 | [Rn] 5f <sup>9</sup>           |
| Es | [Rn] 7s <sup>2</sup> 5f <sup>11</sup>                 | [Rn] 5f <sup>10</sup>          |
| Fm | [Rn] 7s <sup>2</sup> 5f <sup>12</sup>                 | [Rn] 5f <sup>11</sup>          |
| Md | [Rn] 7s <sup>2</sup> 5f <sup>13</sup>                 | [Rn] 5f <sup>12</sup>          |
| No | [Rn] 7s <sup>2</sup> 5f <sup>14</sup>                 | [Rn] 5f <sup>13</sup>          |
| Lr | [Rn] 7s <sup>2</sup> 5f <sup>14</sup> 7p <sup>1</sup> | [Rn] 5f <sup>14</sup>          |

## 7. Cartesian Coordinates (Angstroms) and Frequencies (cm<sup>-1</sup>) of Optimized Geometries

Cartesian Coordinates (Angstroms) and Frequencies (cm<sup>-1</sup>) of Optimized Geometries (SR)

[AcF<sub>3</sub>]

|    | X            | Y            | Z            |
|----|--------------|--------------|--------------|
| Ac | 0.000000000  | 0.000000000  | -0.355987000 |
| F  | -1.038698000 | -1.799078000 | 0.345756000  |
| F  | 2.077396000  | 0.000000000  | 0.345756000  |
| F  | -1.038698000 | 1.799078000  | 0.345756000  |

Frequencies (cm<sup>-1</sup>)

|   |         |
|---|---------|
| 1 | 76.611  |
| 2 | 106.214 |
| 3 | 106.214 |
| 4 | 467.913 |
| 5 | 467.913 |
| 6 | 505.627 |

**[ThF<sub>3</sub>]**

|    | X               | Y               | Z               |
|----|-----------------|-----------------|-----------------|
| Th | 0.000000000000  | 0.000000000000  | -0.052465000000 |
| F  | -1.051173000000 | -1.820686000000 | -0.013138000000 |
| F  | -1.051173000000 | 1.820686000000  | -0.013138000000 |
| F  | 2.102347000000  | 0.000000000000  | -0.013138000000 |

Frequencies (cm<sup>-1</sup>)

|   |         |
|---|---------|
| 1 | 44.458  |
| 2 | 95.092  |
| 3 | 95.092  |
| 4 | 534.079 |
| 5 | 534.079 |
| 6 | 562.882 |

**[PaF<sub>3</sub>]**

|    | X               | Y               | Z               |
|----|-----------------|-----------------|-----------------|
| Pa | 0.000000000000  | 0.000000000000  | -0.226571000000 |
| F  | -0.953924000000 | -1.652244000000 | 0.556067000000  |
| F  | -0.953924000000 | 1.652244000000  | 0.556067000000  |
| F  | 1.907847000000  | 0.000000000000  | 0.556067000000  |

Frequencies (cm<sup>-1</sup>)

|   |         |
|---|---------|
| 1 | 89.157  |
| 2 | 93.862  |
| 3 | 93.862  |
| 4 | 516.732 |
| 5 | 516.732 |
| 6 | 569.497 |

**[UF<sub>3</sub>]**

|   | X              | Y              | Z              |
|---|----------------|----------------|----------------|
| U | 0.000000000000 | 0.000000000000 | 0.284534000000 |

|   |                 |                 |                 |
|---|-----------------|-----------------|-----------------|
| F | -1.859942000000 | 0.000000000000  | -0.606154000000 |
| F | 0.929971000000  | -1.610757000000 | -0.606154000000 |
| F | 0.929971000000  | 1.610757000000  | -0.606154000000 |

Frequencies (cm<sup>-1</sup>)

|   |         |
|---|---------|
| 1 | 111.136 |
| 2 | 170.024 |
| 3 | 170.024 |
| 4 | 559.368 |
| 5 | 570.858 |
| 6 | 570.858 |

### [NpF<sub>3</sub>]

|    | X               | Y               | Z               |
|----|-----------------|-----------------|-----------------|
| Np | -0.751151000000 | -0.989676000000 | 0.000000000000  |
| F  | -2.576034000000 | -1.945543000000 | 0.000000000000  |
| F  | 0.200367000000  | -1.866017000000 | -1.603312000000 |
| F  | 0.200367000000  | -1.866017000000 | 1.603312000000  |

Frequencies (cm<sup>-1</sup>)

|   |         |
|---|---------|
| 1 | 113.362 |
| 2 | 122.845 |
| 3 | 123.029 |
| 4 | 530.214 |
| 5 | 530.285 |
| 6 | 551.991 |

### [PuF<sub>3</sub>]

|    | X               | Y               | Z               |
|----|-----------------|-----------------|-----------------|
| Pu | 0.000000000000  | 0.000000000000  | -0.143971000000 |
| F  | -0.952864000000 | -1.650408000000 | -0.943121000000 |
| F  | 1.905727000000  | 0.000000000000  | -0.943121000000 |
| F  | -0.952864000000 | 1.650408000000  | -0.943121000000 |

Frequencies (cm<sup>-1</sup>)

|   |         |
|---|---------|
| 1 | 115.384 |
| 2 | 115.384 |
| 3 | 155.067 |
| 4 | 526.627 |
| 5 | 526.627 |
| 6 | 548.389 |

### [AmF<sub>3</sub>]

|    | X               | Y               | Z               |
|----|-----------------|-----------------|-----------------|
| Am | -0.495131000000 | -0.030499000000 | 0.048813000000  |
| F  | 0.672973000000  | -1.693709000000 | -0.350185000000 |
| F  | -2.085295000000 | -0.699880000000 | 1.196454000000  |
| F  | 0.640669000000  | 1.192557000000  | 1.275308000000  |

Frequencies (cm<sup>-1</sup>)

|   |         |
|---|---------|
| 1 | 110.133 |
| 2 | 140.031 |
| 3 | 140.273 |
| 4 | 510.477 |
| 5 | 511.187 |
| 6 | 553.025 |

**[CmF<sub>3</sub>]**

|    | X               | Y               | Z               |
|----|-----------------|-----------------|-----------------|
| Cm | 0.000000000000  | 0.000000000000  | -0.713389000000 |
| F  | -1.898934000000 | 0.000000000000  | -1.521257000000 |
| F  | 0.949467000000  | -1.644525000000 | -1.521257000000 |
| F  | 0.949467000000  | 1.644525000000  | -1.521257000000 |

Frequencies (cm<sup>-1</sup>)

|   |         |
|---|---------|
| 1 | 104.708 |
| 2 | 137.186 |
| 3 | 137.186 |
| 4 | 523.225 |
| 5 | 523.225 |
| 6 | 555.285 |

**[BkF<sub>3</sub>]**

|    | X               | Y               | Z               |
|----|-----------------|-----------------|-----------------|
| Bk | 0.000000000000  | 0.000000000000  | -0.168667000000 |
| F  | -0.938995000000 | 1.626387000000  | 0.650108000000  |
| F  | -0.938995000000 | -1.626387000000 | 0.650108000000  |
| F  | 1.877990000000  | 0.000000000000  | 0.650108000000  |

Frequencies (cm<sup>-1</sup>)

|   |         |
|---|---------|
| 1 | 111.117 |
| 2 | 134.196 |
| 3 | 134.196 |
| 4 | 523.356 |
| 5 | 523.356 |
| 6 | 560.270 |

**[CfF<sub>3</sub>]**

|    | X               | Y               | Z               |
|----|-----------------|-----------------|-----------------|
| Cf | 0.000000000000  | 0.000000000000  | -0.111235000000 |
| F  | -0.965162000000 | 1.671709000000  | 0.579606000000  |
| F  | -0.965162000000 | -1.671709000000 | 0.579606000000  |
| F  | 1.930323000000  | 0.000000000000  | 0.579606000000  |

Frequencies (cm<sup>-1</sup>)

|   |         |
|---|---------|
| 1 | 131.926 |
|---|---------|

|   |         |
|---|---------|
| 2 | 141.701 |
| 3 | 141.701 |
| 4 | 524.282 |
| 5 | 524.282 |
| 6 | 551.460 |

**[EsF<sub>3</sub>]**

|    | X               | Y               | Z               |
|----|-----------------|-----------------|-----------------|
| Es | 0.000000000000  | 0.000000000000  | -0.478280000000 |
| F  | -0.985867000000 | 1.707572000000  | -1.037958000000 |
| F  | 1.971734000000  | 0.000000000000  | -1.037958000000 |
| F  | -0.985867000000 | -1.707572000000 | -1.037958000000 |

Frequencies (cm<sup>-1</sup>)

|   |         |
|---|---------|
| 1 | 80.570  |
| 2 | 103.526 |
| 3 | 103.526 |
| 4 | 520.908 |
| 5 | 520.908 |
| 6 | 542.017 |

**[FmF<sub>3</sub>]**

|    | X               | Y               | Z               |
|----|-----------------|-----------------|-----------------|
| Fm | 0.000000000000  | 0.000000000000  | -0.191104000000 |
| F  | -0.938481000000 | 1.625497000000  | 0.618706000000  |
| F  | -0.938481000000 | -1.625497000000 | 0.618706000000  |
| F  | 1.876962000000  | 0.000000000000  | 0.618706000000  |

Frequencies (cm<sup>-1</sup>)

|   |         |
|---|---------|
| 1 | 81.761  |
| 2 | 149.631 |
| 3 | 149.631 |
| 4 | 515.335 |
| 5 | 515.335 |
| 6 | 533.441 |

**[MdF<sub>3</sub>]**

|    | X               | Y               | Z               |
|----|-----------------|-----------------|-----------------|
| Md | 0.000000000000  | 0.000000000000  | -0.379614000000 |
| F  | -1.034628000000 | 1.792028000000  | -0.403753000000 |
| F  | 2.069256000000  | 0.000000000000  | -0.403753000000 |
| F  | -1.034628000000 | -1.792028000000 | -0.403753000000 |

Frequencies (cm<sup>-1</sup>)

|   |         |
|---|---------|
| 1 | 79.230  |
| 2 | 79.230  |
| 3 | 108.368 |
| 4 | 492.296 |



5 492.296  
6 497.592

**[LrF<sub>3</sub>]**

|    | X               | Y               | Z               |
|----|-----------------|-----------------|-----------------|
| Lr | 0.000000000000  | 0.000000000000  | -0.050556000000 |
| F  | -0.952262000000 | 1.649367000000  | 0.628754000000  |
| F  | -0.952262000000 | -1.649367000000 | 0.628754000000  |
| F  | 1.904525000000  | 0.000000000000  | 0.628754000000  |

Frequencies (cm<sup>-1</sup>)

1 100.634  
2 149.423  
3 149.423  
4 551.167  
5 551.167  
6 572.867

**[AcCl<sub>3</sub>]**

|    | X               | Y               | Z               |
|----|-----------------|-----------------|-----------------|
| Ac | 0.000000000000  | 0.000000000000  | -0.358341000000 |
| Cl | -1.284504000000 | -2.224826000000 | 0.362779000000  |
| Cl | 2.569008000000  | 0.000000000000  | 0.362779000000  |
| Cl | -1.284504000000 | 2.224826000000  | 0.362779000000  |

Frequencies (cm<sup>-1</sup>)

1 37.579  
2 61.876  
3 61.876  
4 292.726  
5 292.726  
6 298.409

**[ThCl<sub>3</sub>]**

|    | X               | Y               | Z               |
|----|-----------------|-----------------|-----------------|
| Th | 0.144538000000  | -0.580706000000 | -0.509828000000 |
| Cl | 0.210361000000  | -3.127475000000 | -0.283614000000 |
| Cl | -2.088475000000 | 0.607317000000  | -0.887198000000 |
| Cl | 2.315337000000  | 0.766531000000  | -0.403553000000 |

Frequencies (cm<sup>-1</sup>)

1 40.365  
2 57.759  
3 58.131  
4 325.789  
5 326.085  
6 327.915

**[PaCl<sub>3</sub>]**

|    | X               | Y               | Z               |
|----|-----------------|-----------------|-----------------|
| Pa | 0.000000000000  | 0.000000000000  | -0.203336000000 |
| Cl | -1.207273000000 | -2.091058000000 | 0.536732000000  |
| Cl | -1.207273000000 | 2.091058000000  | 0.536732000000  |
| Cl | 2.414546000000  | 0.000000000000  | 0.536732000000  |

Frequencies (cm<sup>-1</sup>)

|   |         |
|---|---------|
| 1 | 46.188  |
| 2 | 59.02   |
| 3 | 59.02   |
| 4 | 319.831 |
| 5 | 319.938 |
| 6 | 319.938 |

### [UCl<sub>3</sub>]

|    | X               | Y               | Z               |
|----|-----------------|-----------------|-----------------|
| U  | 0.000000000000  | 0.000000000000  | 0.275636000000  |
| Cl | -2.317419000000 | 0.000000000000  | -0.687906000000 |
| Cl | 1.158709000000  | -2.006944000000 | -0.687906000000 |
| Cl | 1.158709000000  | 2.006944000000  | -0.687906000000 |

Frequencies (cm<sup>-1</sup>)

|   |         |
|---|---------|
| 1 | 70.34   |
| 2 | 80.683  |
| 3 | 80.683  |
| 4 | 321.139 |
| 5 | 321.139 |
| 6 | 322.022 |

### [NpCl<sub>3</sub>]

|    | X               | Y               | Z               |
|----|-----------------|-----------------|-----------------|
| Np | -0.750893000000 | -1.004935000000 | 0.000000000000  |
| Cl | -3.047121000000 | -2.014822000000 | 0.000000000000  |
| Cl | 0.438810000000  | -1.915306000000 | -2.009732000000 |
| Cl | 0.438810000000  | -1.915306000000 | 2.009732000000  |

Frequencies (cm<sup>-1</sup>)

|   |         |
|---|---------|
| 1 | 56.542  |
| 2 | 70.643  |
| 3 | 70.828  |
| 4 | 315.481 |
| 5 | 316.305 |
| 6 | 319.268 |

### [PuCl<sub>3</sub>]

|    | X              | Y              | Z               |
|----|----------------|----------------|-----------------|
| Pu | 0.000000000000 | 0.000000000000 | -0.158573000000 |

|    |                 |                 |                 |
|----|-----------------|-----------------|-----------------|
| Cl | -1.185011000000 | -2.052500000000 | -0.969635000000 |
| Cl | 2.370022000000  | 0.000000000000  | -0.969635000000 |
| Cl | -1.185011000000 | 2.052500000000  | -0.969635000000 |

Frequencies (cm<sup>-1</sup>)

|   |         |
|---|---------|
| 1 | 66.319  |
| 2 | 66.319  |
| 3 | 77.344  |
| 4 | 314.558 |
| 5 | 314.625 |
| 6 | 314.625 |

**[AmCl<sub>3</sub>]**

|    | X               | Y               | Z               |
|----|-----------------|-----------------|-----------------|
| Am | -0.281975000000 | 0.064892000000  | 0.000000000000  |
| Cl | 1.741141000000  | -1.416281000000 | 0.000000000000  |
| Cl | -1.433273000000 | -0.083689000000 | -2.236409000000 |
| Cl | -1.433273000000 | -0.083689000000 | 2.236409000000  |

Frequencies (cm<sup>-1</sup>)

|   |         |
|---|---------|
| 1 | 28.92   |
| 2 | 32.729  |
| 3 | 44.658  |
| 4 | 297.251 |
| 5 | 305.532 |
| 6 | 306.130 |

**[CmCl<sub>3</sub>]**

|    | X               | Y               | Z               |
|----|-----------------|-----------------|-----------------|
| Cm | 0.000000000000  | 0.000000000000  | -0.710170000000 |
| Cl | -2.331898000000 | 0.000000000000  | -1.571971000000 |
| Cl | 1.165949000000  | -2.019483000000 | -1.571971000000 |
| Cl | 1.165949000000  | 2.019483000000  | -1.571971000000 |

Frequencies (cm<sup>-1</sup>)

|   |         |
|---|---------|
| 1 | 55.15   |
| 2 | 76.699  |
| 3 | 76.699  |
| 4 | 316.238 |
| 5 | 316.238 |
| 6 | 321.492 |

**[BkCl<sub>3</sub>]**

|    | X               | Y               | Z               |
|----|-----------------|-----------------|-----------------|
| Bk | 0.000000000000  | 0.000000000000  | -0.173098000000 |
| Cl | -1.152797000000 | 1.996702000000  | 0.716578000000  |
| Cl | -1.152797000000 | -1.996702000000 | 0.716578000000  |
| Cl | 2.305593000000  | 0.000000000000  | 0.716578000000  |

Frequencies (cm<sup>-1</sup>)

|   |         |
|---|---------|
| 1 | 57.778  |
| 2 | 73.533  |
| 3 | 73.533  |
| 4 | 314.59  |
| 5 | 314.59  |
| 6 | 321.026 |

[CfCl<sub>3</sub>]

|    | X               | Y               | Z               |
|----|-----------------|-----------------|-----------------|
| Cf | 0.000000000000  | 0.000000000000  | -0.169625000000 |
| Cl | -1.125115000000 | 1.948756000000  | 0.819924000000  |
| Cl | -1.125115000000 | -1.948756000000 | 0.819924000000  |
| Cl | 2.250230000000  | 0.000000000000  | 0.819924000000  |

Frequencies (cm<sup>-1</sup>)

|   |         |
|---|---------|
| 1 | 62.017  |
| 2 | 70.267  |
| 3 | 70.267  |
| 4 | 313.523 |
| 5 | 313.523 |
| 6 | 314.141 |

[EsCl<sub>3</sub>]

|    | X               | Y               | Z               |
|----|-----------------|-----------------|-----------------|
| Es | 0.000000000000  | 0.000000000000  | -0.424786000000 |
| Cl | -1.160752000000 | 2.010481000000  | -1.263756000000 |
| Cl | 2.321504000000  | 0.000000000000  | -1.263756000000 |
| Cl | -1.160752000000 | -2.010481000000 | -1.263756000000 |

Frequencies (cm<sup>-1</sup>)

|   |         |
|---|---------|
| 1 | 43.544  |
| 2 | 142.632 |
| 3 | 142.632 |
| 4 | 298.566 |
| 5 | 327.064 |
| 6 | 327.064 |

[FmCl<sub>3</sub>]

|    | X               | Y               | Z               |
|----|-----------------|-----------------|-----------------|
| Fm | 0.000000000000  | 0.000000000000  | -0.110653000000 |
| Cl | -1.168276000000 | 2.023514000000  | 0.745232000000  |
| Cl | -1.168276000000 | -2.023514000000 | 0.745232000000  |
| Cl | 2.336552000000  | 0.000000000000  | 0.745232000000  |

Frequencies (cm<sup>-1</sup>)

|   |        |
|---|--------|
| 1 | 36.497 |
|---|--------|

|   |         |
|---|---------|
| 2 | 50.405  |
| 3 | 50.405  |
| 4 | 275.381 |
| 5 | 275.381 |
| 6 | 282.221 |

**[MdCl<sub>3</sub>]**

|    | X               | Y               | Z              |
|----|-----------------|-----------------|----------------|
| Md | 0.000000000000  | 0.000000000000  | 0.132527000000 |
| Cl | -1.255019000000 | 2.173756000000  | 0.144767000000 |
| Cl | -1.255019000000 | -2.173756000000 | 0.144767000000 |
| Cl | 2.510037000000  | 0.000000000000  | 0.144767000000 |

Frequencies (cm<sup>-1</sup>)

|   |         |
|---|---------|
| 1 | 53.536  |
| 2 | 53.536  |
| 3 | 61.316  |
| 4 | 260.475 |
| 5 | 273.941 |
| 6 | 273.941 |

**[NoCl<sub>3</sub>]**

|    | X               | Y               | Z              |
|----|-----------------|-----------------|----------------|
| No | 0.000000000000  | 0.000000000000  | 0.081667000000 |
| Cl | -1.270932000000 | 2.201320000000  | 0.265608000000 |
| Cl | -1.270932000000 | -2.201320000000 | 0.265608000000 |
| Cl | 2.541865000000  | 0.000000000000  | 0.265608000000 |

Frequencies (cm<sup>-1</sup>)

|   |         |
|---|---------|
| 1 | 13.963  |
| 2 | 23.659  |
| 3 | 23.659  |
| 4 | 239.939 |
| 5 | 245.053 |
| 6 | 245.053 |

**[LrCl<sub>3</sub>]**

|    | X               | Y               | Z               |
|----|-----------------|-----------------|-----------------|
| Lr | 0.000000000000  | 0.000000000000  | -0.058543000000 |
| Cl | -1.170634000000 | 2.027597000000  | 0.608867000000  |
| Cl | -1.170634000000 | -2.027597000000 | 0.608867000000  |
| Cl | 2.341267000000  | 0.000000000000  | 0.608867000000  |

Frequencies (cm<sup>-1</sup>)

|   |         |
|---|---------|
| 1 | 48.609  |
| 2 | 82.501  |
| 3 | 82.501  |
| 4 | 327.971 |

5 329.711  
6 329.711

**[AcBr<sub>3</sub>]**

|    | X               | Y               | Z              |
|----|-----------------|-----------------|----------------|
| Ac | 0.000000000000  | 0.000000000000  | 0.389169000000 |
| Br | -1.366614000000 | -2.367046000000 | 1.105913000000 |
| Br | 2.733229000000  | 0.000000000000  | 1.105913000000 |
| Br | -1.366614000000 | 2.367046000000  | 1.105913000000 |

Frequencies (cm<sup>-1</sup>)

1 25.222  
2 39.729  
3 39.729  
4 188.809  
5 204.123  
6 204.123

**[ThBr<sub>3</sub>]**

|    | X               | Y               | Z              |
|----|-----------------|-----------------|----------------|
| Th | 0.000000000000  | 0.000000000000  | 0.763082000000 |
| Br | -1.356290000000 | -2.349163000000 | 0.765921000000 |
| Br | 2.712579000000  | 0.000000000000  | 0.765921000000 |
| Br | -1.356290000000 | 2.349163000000  | 0.765921000000 |

Frequencies (cm<sup>-1</sup>)

1 31.381  
2 37.813  
3 37.813  
4 202.522  
5 226.908  
6 226.908

**[PaBr<sub>3</sub>]**

|    | X               | Y               | Z               |
|----|-----------------|-----------------|-----------------|
| Pa | 0.000000000000  | 0.000000000000  | -0.131531000000 |
| Br | -1.300687000000 | -2.252856000000 | 0.538336000000  |
| Br | -1.300687000000 | 2.252856000000  | 0.538336000000  |
| Br | 2.601374000000  | 0.000000000000  | 0.538336000000  |

Frequencies (cm<sup>-1</sup>)

1 29.025  
2 37.924  
3 37.924  
4 200.166  
5 222.758  
6 222.758

**[UBr<sub>3</sub>]**

|    | X               | Y               | Z               |
|----|-----------------|-----------------|-----------------|
| U  | 0.000000000000  | 0.000000000000  | 0.222350000000  |
| Br | -2.509942000000 | 0.000000000000  | -0.707370000000 |
| Br | 1.254971000000  | -2.173674000000 | -0.707370000000 |
| Br | 1.254971000000  | 2.173674000000  | -0.707370000000 |

Frequencies (cm<sup>-1</sup>)

|   |         |
|---|---------|
| 1 | 39.078  |
| 2 | 44.85   |
| 3 | 44.85   |
| 4 | 203.195 |
| 5 | 216.594 |
| 6 | 216.594 |

**[NpBr<sub>3</sub>]**

|    | X               | Y               | Z               |
|----|-----------------|-----------------|-----------------|
| Np | -0.749366000000 | -1.043943000000 | 0.000000000000  |
| Br | -3.219787000000 | -2.049281000000 | 0.000000000000  |
| Br | 0.526808000000  | -1.942638000000 | -2.162528000000 |
| Br | 0.526808000000  | -1.942638000000 | 2.162528000000  |

Frequencies (cm<sup>-1</sup>)

|   |         |
|---|---------|
| 1 | 36.464  |
| 2 | 44.301  |
| 3 | 44.315  |
| 4 | 203.233 |
| 5 | 215.962 |
| 6 | 215.986 |

**[PuBr<sub>3</sub>]**

|    | X               | Y               | Z               |
|----|-----------------|-----------------|-----------------|
| Pu | 0.000000000000  | 0.000000000000  | -0.221693000000 |
| Br | -1.278788000000 | -2.214926000000 | -0.977448000000 |
| Br | 2.557576000000  | 0.000000000000  | -0.977448000000 |
| Br | -1.278788000000 | 2.214926000000  | -0.977448000000 |

Frequencies (cm<sup>-1</sup>)

|   |         |
|---|---------|
| 1 | 41.043  |
| 2 | 41.043  |
| 3 | 48.574  |
| 4 | 195.862 |
| 5 | 214.09  |
| 6 | 214.09  |

**[AmBr<sub>3</sub>]**

| X | Y | Z |
|---|---|---|
|---|---|---|

|    |                 |                 |                 |
|----|-----------------|-----------------|-----------------|
| Am | 0.000000000000  | 0.000000000000  | -1.298003000000 |
| Br | -1.305814000000 | 2.261736000000  | -1.895741000000 |
| Br | 2.611627000000  | 0.000000000000  | -1.895741000000 |
| Br | -1.305814000000 | -2.261736000000 | -1.895741000000 |

Frequencies (cm<sup>-1</sup>)

|   |         |
|---|---------|
| 1 | 6.125   |
| 2 | 6.125   |
| 3 | 26.296  |
| 4 | 181.816 |
| 5 | 205.219 |
| 6 | 205.219 |

**[CmBr<sub>3</sub>]**

|    | X               | Y               | Z               |
|----|-----------------|-----------------|-----------------|
| Cm | 0.000000000000  | 0.000000000000  | -0.798854000000 |
| Br | -2.513862000000 | 0.000000000000  | -1.616013000000 |
| Br | 1.256931000000  | -2.177068000000 | -1.616013000000 |
| Br | 1.256931000000  | 2.177068000000  | -1.616013000000 |

Frequencies (cm<sup>-1</sup>)

|   |         |
|---|---------|
| 1 | 34.008  |
| 2 | 47.709  |
| 3 | 47.709  |
| 4 | 201.756 |
| 5 | 215.839 |
| 6 | 215.839 |

**[BkBr<sub>3</sub>]**

|    | X               | Y               | Z               |
|----|-----------------|-----------------|-----------------|
| Bk | 0.000000000000  | 0.000000000000  | -0.104161000000 |
| Br | -1.237947000000 | 2.144187000000  | 0.777395000000  |
| Br | -1.237947000000 | -2.144187000000 | 0.777395000000  |
| Br | 2.475894000000  | 0.000000000000  | 0.777395000000  |

Frequencies (cm<sup>-1</sup>)

|   |         |
|---|---------|
| 1 | 36.48   |
| 2 | 45.049  |
| 3 | 45.049  |
| 4 | 201.89  |
| 5 | 214.057 |
| 6 | 214.057 |

**[CfBr<sub>3</sub>]**

|    | X               | Y               | Z               |
|----|-----------------|-----------------|-----------------|
| Cf | 0.000000000000  | 0.000000000000  | -0.072177000000 |
| Br | -1.213746000000 | 2.102269000000  | 0.934715000000  |
| Br | -1.213746000000 | -2.102269000000 | 0.934715000000  |



|    |                |                |                |
|----|----------------|----------------|----------------|
| Br | 2.427491000000 | 0.000000000000 | 0.934715000000 |
|----|----------------|----------------|----------------|

Frequencies (cm<sup>-1</sup>)

|   |         |
|---|---------|
| 1 | 40.51   |
| 2 | 61.716  |
| 3 | 61.716  |
| 4 | 196.747 |
| 5 | 209.56  |
| 6 | 209.56  |

**[EsBr<sub>3</sub>]**

|    | X               | Y               | Z               |
|----|-----------------|-----------------|-----------------|
| Es | 0.000000000000  | 0.000000000000  | -0.801378000000 |
| Br | -1.251134000000 | 2.167027000000  | -1.614341000000 |
| Br | 2.502267000000  | 0.000000000000  | -1.614341000000 |
| Br | -1.251134000000 | -2.167027000000 | -1.614341000000 |

Frequencies (cm<sup>-1</sup>)

|   |         |
|---|---------|
| 1 | 37.515  |
| 2 | 39.732  |
| 3 | 39.732  |
| 4 | 184.06  |
| 5 | 202.001 |
| 6 | 202.001 |

**[FmBr<sub>3</sub>]**

|    | X               | Y               | Z               |
|----|-----------------|-----------------|-----------------|
| Fm | 0.000000000000  | 0.000000000000  | -0.026775000000 |
| Br | -1.245974000000 | 2.158091000000  | 0.878310000000  |
| Br | -1.245974000000 | -2.158091000000 | 0.878310000000  |
| Br | 2.491948000000  | 0.000000000000  | 0.878310000000  |

Frequencies (cm<sup>-1</sup>)

|   |         |
|---|---------|
| 1 | 26.303  |
| 2 | 27.514  |
| 3 | 27.514  |
| 4 | 175.095 |
| 5 | 184.349 |
| 6 | 184.349 |

**[MdBr<sub>3</sub>]**

|    | X               | Y               | Z               |
|----|-----------------|-----------------|-----------------|
| Md | 0.000000000000  | 0.000000000000  | -0.190740000000 |
| Br | -1.321275000000 | 2.288515000000  | -0.619321000000 |
| Br | -1.321275000000 | -2.288515000000 | -0.619321000000 |
| Br | 2.642550000000  | 0.000000000000  | -0.619321000000 |

Frequencies (cm<sup>-1</sup>)

|   |         |
|---|---------|
| 1 | 30.558  |
| 2 | 30.558  |
| 3 | 43.649  |
| 4 | 157.994 |
| 5 | 180.569 |
| 6 | 180.569 |

**[NoBr<sub>3</sub>]**

|    | X               | Y               | Z               |
|----|-----------------|-----------------|-----------------|
| No | 0.000000000000  | 0.000000000000  | -0.611507000000 |
| Br | -1.357408000000 | 2.351100000000  | -0.747721000000 |
| Br | -1.357408000000 | -2.351100000000 | -0.747721000000 |
| Br | 2.714816000000  | 0.000000000000  | -0.747721000000 |

Frequencies (cm<sup>-1</sup>)

|   |         |
|---|---------|
| 1 | 12.872  |
| 2 | 18.366  |
| 3 | 18.366  |
| 4 | 143.968 |
| 5 | 162.749 |
| 6 | 162.749 |

**[LrBr<sub>3</sub>]**

|    | X               | Y               | Z              |
|----|-----------------|-----------------|----------------|
| Lr | 0.000000000000  | 0.000000000000  | 0.086158000000 |
| Br | -1.263060000000 | 2.187684000000  | 0.643356000000 |
| Br | -1.263060000000 | -2.187684000000 | 0.643356000000 |
| Br | 2.526120000000  | 0.000000000000  | 0.643356000000 |

Frequencies (cm<sup>-1</sup>)

|   |         |
|---|---------|
| 1 | 25.751  |
| 2 | 51.325  |
| 3 | 51.325  |
| 4 | 202.442 |
| 5 | 224.646 |
| 6 | 224.646 |

**[AcI<sub>3</sub>]**

|    | X               | Y               | Z              |
|----|-----------------|-----------------|----------------|
| Ac | 0.000000000000  | 0.000000000000  | 0.551158000000 |
| I  | -1.499823000000 | -2.597770000000 | 1.137261000000 |
| I  | 2.999647000000  | 0.000000000000  | 1.137261000000 |
| I  | -1.499823000000 | 2.597770000000  | 1.137261000000 |

Frequencies (cm<sup>-1</sup>)

|   |        |
|---|--------|
| 1 | 13.985 |
| 2 | 28.274 |
| 3 | 28.274 |

|   |         |
|---|---------|
| 4 | 134.778 |
| 5 | 164.938 |
| 6 | 164.938 |

**[ThI<sub>3</sub>]**

|    | X               | Y               | Z              |
|----|-----------------|-----------------|----------------|
| Th | 0.000000000000  | 0.000000000000  | 0.765199000000 |
| I  | -1.468331000000 | -2.543223000000 | 0.765057000000 |
| I  | 2.936661000000  | 0.000000000000  | 0.765057000000 |
| I  | -1.468331000000 | 2.543223000000  | 0.765057000000 |

Frequencies (cm<sup>-1</sup>)

|   |         |
|---|---------|
| 1 | 26.844  |
| 2 | 27.067  |
| 3 | 27.067  |
| 4 | 144.131 |
| 5 | 181.273 |
| 6 | 181.273 |

**[PaI<sub>3</sub>]**

|    | X               | Y               | Z               |
|----|-----------------|-----------------|-----------------|
| Pa | 0.000000000000  | 0.000000000000  | -0.051398000000 |
| I  | -1.424139000000 | -2.466680000000 | 0.557975000000  |
| I  | -1.424139000000 | 2.466680000000  | 0.557975000000  |
| I  | 2.848277000000  | 0.000000000000  | 0.557975000000  |

Frequencies (cm<sup>-1</sup>)

|   |         |
|---|---------|
| 1 | 18.66   |
| 2 | 27.669  |
| 3 | 27.669  |
| 4 | 144.204 |
| 5 | 178.149 |
| 6 | 178.149 |

**[UI<sub>3</sub>]**

|   | X               | Y               | Z               |
|---|-----------------|-----------------|-----------------|
| U | 0.000000000000  | 0.000000000000  | 0.187115000000  |
| I | -2.743833000000 | 0.000000000000  | -0.759463000000 |
| I | 1.371917000000  | -2.376229000000 | -0.759463000000 |
| I | 1.371917000000  | 2.376229000000  | -0.759463000000 |

Frequencies (cm<sup>-1</sup>)

|   |         |
|---|---------|
| 1 | 28.317  |
| 2 | 32.282  |
| 3 | 32.282  |
| 4 | 148.746 |
| 5 | 171.822 |
| 6 | 171.822 |

**[NpI<sub>3</sub>]**

|    | X               | Y               | Z              |
|----|-----------------|-----------------|----------------|
| Np | 0.000000000000  | 0.000000000000  | 0.970180000000 |
| I  | -2.694060000000 | 0.000000000000  | 2.033087000000 |
| I  | 1.347030000000  | -2.333125000000 | 2.033087000000 |
| I  | 1.347030000000  | 2.333125000000  | 2.033087000000 |

Frequencies (cm<sup>-1</sup>)

|   |         |
|---|---------|
| 1 | 30.46   |
| 2 | 33.319  |
| 3 | 33.319  |
| 4 | 151.772 |
| 5 | 169.333 |
| 6 | 169.333 |

**[PuI<sub>3</sub>]**

|    | X               | Y               | Z               |
|----|-----------------|-----------------|-----------------|
| Pu | 0.000000000000  | 0.000000000000  | -0.264600000000 |
| I  | -1.396293000000 | -2.418450000000 | -1.021673000000 |
| I  | 2.792586000000  | 0.000000000000  | -1.021673000000 |
| I  | -1.396293000000 | 2.418450000000  | -1.021673000000 |

Frequencies (cm<sup>-1</sup>)

|   |         |
|---|---------|
| 1 | 28.375  |
| 2 | 28.375  |
| 3 | 35.235  |
| 4 | 139.498 |
| 5 | 167.863 |
| 6 | 167.863 |

**[AmI<sub>3</sub>]**

|    | X               | Y               | Z               |
|----|-----------------|-----------------|-----------------|
| Am | 0.000000000000  | 0.000000000000  | -1.474788000000 |
| I  | -1.447012000000 | 2.506297000000  | -1.867872000000 |
| I  | 2.894023000000  | 0.000000000000  | -1.867872000000 |
| I  | -1.447012000000 | -2.506297000000 | -1.867872000000 |

Frequencies (cm<sup>-1</sup>)

|   |         |
|---|---------|
| 1 | 13.866  |
| 2 | 13.866  |
| 3 | 13.92   |
| 4 | 122.49  |
| 5 | 156.939 |
| 6 | 156.939 |

**[CmI<sub>3</sub>]**

|    | X               | Y               | Z               |
|----|-----------------|-----------------|-----------------|
| Cm | 0.000000000000  | 0.000000000000  | -0.946577000000 |
| I  | -2.782496000000 | 0.000000000000  | -1.652070000000 |
| I  | 1.391248000000  | -2.409712000000 | -1.652070000000 |
| I  | 1.391248000000  | 2.409712000000  | -1.652070000000 |

Frequencies (cm<sup>-1</sup>)

|   |         |
|---|---------|
| 1 | 21.049  |
| 2 | 32.712  |
| 3 | 32.712  |
| 4 | 142.125 |
| 5 | 170.368 |
| 6 | 170.368 |

### [BkI<sub>3</sub>]

|    | X               | Y               | Z              |
|----|-----------------|-----------------|----------------|
| Bk | 0.000000000000  | 0.000000000000  | 0.105290000000 |
| I  | -1.390092000000 | 2.407709000000  | 0.776297000000 |
| I  | -1.390092000000 | -2.407709000000 | 0.776297000000 |
| I  | 2.780183000000  | 0.000000000000  | 0.776297000000 |

Frequencies (cm<sup>-1</sup>)

|   |         |
|---|---------|
| 1 | 19.066  |
| 2 | 28.283  |
| 3 | 28.283  |
| 4 | 137.825 |
| 5 | 168.306 |
| 6 | 168.306 |

### [CfI<sub>3</sub>]

|    | X               | Y               | Z              |
|----|-----------------|-----------------|----------------|
| Cf | 0.000000000000  | 0.000000000000  | 0.391095000000 |
| I  | -1.421313000000 | 2.461786000000  | 0.844596000000 |
| I  | -1.421313000000 | -2.461786000000 | 0.844596000000 |
| I  | 2.842626000000  | 0.000000000000  | 0.844596000000 |

Frequencies (cm<sup>-1</sup>)

|   |         |
|---|---------|
| 1 | 12.873  |
| 2 | 17.63   |
| 3 | 17.63   |
| 4 | 126.696 |
| 5 | 159.173 |
| 6 | 159.173 |

### [EsI<sub>3</sub>]

|    | X              | Y              | Z               |
|----|----------------|----------------|-----------------|
| Es | 0.000000000000 | 0.000000000000 | -1.334805000000 |

|   |                 |                 |                 |
|---|-----------------|-----------------|-----------------|
| I | -1.432425000000 | 2.481033000000  | -1.653011000000 |
| I | 2.864850000000  | 0.000000000000  | -1.653011000000 |
| I | -1.432425000000 | -2.481033000000 | -1.653011000000 |

Frequencies (cm<sup>-1</sup>)

|   |         |
|---|---------|
| 1 | 8.726   |
| 2 | 8.726   |
| 3 | 12.82   |
| 4 | 119.289 |
| 5 | 153.5   |
| 6 | 153.5   |

**[FmI<sub>3</sub>]**

|    | X               | Y               | Z              |
|----|-----------------|-----------------|----------------|
| Fm | 0.000000000000  | 0.000000000000  | 0.521417000000 |
| I  | -1.448960000000 | 2.509673000000  | 0.739976000000 |
| I  | -1.448960000000 | -2.509673000000 | 0.739976000000 |
| I  | 2.897920000000  | 0.000000000000  | 0.739976000000 |

Frequencies (cm<sup>-1</sup>)

|   |         |
|---|---------|
| 1 | 21.755  |
| 2 | 21.755  |
| 3 | 31.081  |
| 4 | 112.999 |
| 5 | 144.518 |
| 6 | 144.518 |

**[MdI<sub>3</sub>]**

|    | X               | Y               | Z               |
|----|-----------------|-----------------|-----------------|
| Md | 0.000000000000  | 0.000000000000  | -0.138041000000 |
| I  | -1.426677000000 | 2.471076000000  | -0.759562000000 |
| I  | -1.426677000000 | -2.471076000000 | -0.759562000000 |
| I  | 2.853353000000  | 0.000000000000  | -0.759562000000 |

Frequencies (cm<sup>-1</sup>)

|   |         |
|---|---------|
| 1 | 17.609  |
| 2 | 17.609  |
| 3 | 32.418  |
| 4 | 111.19  |
| 5 | 134.546 |
| 6 | 134.546 |

**[NoI<sub>3</sub>]**

|    | X               | Y               | Z               |
|----|-----------------|-----------------|-----------------|
| No | 0.000000000000  | 0.000000000000  | -0.679195000000 |
| I  | -1.476692000000 | 2.557706000000  | -0.732329000000 |
| I  | -1.476692000000 | -2.557706000000 | -0.732329000000 |
| I  | 2.953384000000  | 0.000000000000  | -0.732329000000 |

Frequencies (cm<sup>-1</sup>)

|   |         |
|---|---------|
| 1 | 9.483   |
| 2 | 9.483   |
| 3 | 9.636   |
| 4 | 101.333 |
| 5 | 124.968 |
| 6 | 124.968 |

**[LrI<sub>3</sub>]**

|    | X               | Y               | Z              |
|----|-----------------|-----------------|----------------|
| Lr | 0.000000000000  | 0.000000000000  | 0.310320000000 |
| I  | -1.395233000000 | 2.416615000000  | 0.650344000000 |
| I  | -1.395233000000 | -2.416615000000 | 0.650344000000 |
| I  | 2.790466000000  | 0.000000000000  | 0.650344000000 |

Frequencies (cm<sup>-1</sup>)

|   |         |
|---|---------|
| 1 | 10.191  |
| 2 | 35.234  |
| 3 | 35.234  |
| 4 | 140.478 |
| 5 | 176.252 |
| 6 | 176.252 |

**[AcAt<sub>3</sub>]**

|    | X               | Y               | Z              |
|----|-----------------|-----------------|----------------|
| Ac | 0.000000000000  | 0.000000000000  | 0.463323000000 |
| At | -1.524716000000 | -2.640885000000 | 1.234806000000 |
| At | 3.049432000000  | 0.000000000000  | 1.234806000000 |
| At | -1.524716000000 | 2.640885000000  | 1.234806000000 |

Frequencies (cm<sup>-1</sup>)

|   |         |
|---|---------|
| 1 | 15.404  |
| 2 | 21.555  |
| 3 | 21.555  |
| 4 | 105.325 |
| 5 | 137.805 |
| 6 | 137.805 |

**[ThAt<sub>3</sub>]**

|    | X               | Y               | Z              |
|----|-----------------|-----------------|----------------|
| Th | 0.000000000000  | 0.000000000000  | 0.000000000000 |
| At | -3.025059000000 | 0.000000000000  | 0.000000000000 |
| At | 1.512530000000  | -2.619778000000 | 0.000000000000 |
| At | 1.512530000000  | 2.619778000000  | 0.000000000000 |

Frequencies (cm<sup>-1</sup>)

|   |        |
|---|--------|
| 1 | 19.867 |
|---|--------|

|   |         |
|---|---------|
| 2 | 19.867  |
| 3 | 23.218  |
| 4 | 106.503 |
| 5 | 152.734 |
| 6 | 152.734 |

**[PaAt<sub>3</sub>]**

|    | X               | Y               | Z               |
|----|-----------------|-----------------|-----------------|
| Pa | 0.000000000000  | 0.000000000000  | -0.051398000000 |
| I  | -1.424139000000 | -2.466680000000 | 0.557975000000  |
| I  | -1.424139000000 | 2.466680000000  | 0.557975000000  |
| I  | 2.848277000000  | 0.000000000000  | 0.557975000000  |

Frequencies (cm<sup>-1</sup>)

|   |         |
|---|---------|
| 1 | 18.66   |
| 2 | 27.669  |
| 3 | 27.669  |
| 4 | 144.204 |
| 5 | 178.149 |
| 6 | 178.149 |

**[UAt<sub>3</sub>]**

|    | X               | Y               | Z               |
|----|-----------------|-----------------|-----------------|
| U  | 0.000000000000  | 0.000000000000  | 0.229073000000  |
| At | -2.810932000000 | 0.000000000000  | -0.794062000000 |
| At | 1.405466000000  | -2.434339000000 | -0.794062000000 |
| At | 1.405466000000  | 2.434339000000  | -0.794062000000 |

Frequencies (cm<sup>-1</sup>)

|   |         |
|---|---------|
| 1 | 24.197  |
| 2 | 25.024  |
| 3 | 25.024  |
| 4 | 117.071 |
| 5 | 142.407 |
| 6 | 142.407 |

**[NpAt<sub>3</sub>]**

|    | X               | Y               | Z              |
|----|-----------------|-----------------|----------------|
| Np | 0.000000000000  | 0.000000000000  | 0.964861000000 |
| At | -2.774881000000 | 0.000000000000  | 2.077140000000 |
| At | 1.387440000000  | -2.403117000000 | 2.077140000000 |
| At | 1.387440000000  | 2.403117000000  | 2.077140000000 |

Frequencies (cm<sup>-1</sup>)

|   |         |
|---|---------|
| 1 | 25.5    |
| 2 | 25.549  |
| 3 | 25.549  |
| 4 | 119.225 |



5 139.43  
6 139.43

**[PuAt<sub>3</sub>]**

|    | X               | Y               | Z               |
|----|-----------------|-----------------|-----------------|
| Pu | 0.000000000000  | 0.000000000000  | -0.192051000000 |
| At | -1.427709000000 | -2.472865000000 | -1.075050000000 |
| At | 2.855418000000  | 0.000000000000  | -1.075050000000 |
| At | -1.427709000000 | 2.472865000000  | -1.075050000000 |

Frequencies (cm<sup>-1</sup>)

1 22.021  
2 22.021  
3 30.842  
4 107.797  
5 137.07  
6 137.07

**[AmAt<sub>3</sub>]**

|    | X               | Y               | Z               |
|----|-----------------|-----------------|-----------------|
| Am | 0.000000000000  | 0.000000000000  | -1.617172000000 |
| At | -1.507773000000 | 2.611539000000  | -1.841136000000 |
| At | 3.015546000000  | 0.000000000000  | -1.841136000000 |
| At | -1.507773000000 | -2.611539000000 | -1.841136000000 |

Frequencies (cm<sup>-1</sup>)

1 7.595  
2 10.185  
3 10.185  
4 87.603  
5 128.988  
6 128.988

**[CmAt<sub>3</sub>]**

|    | X               | Y               | Z               |
|----|-----------------|-----------------|-----------------|
| Cm | 0.000000000000  | 0.000000000000  | -0.883624000000 |
| At | -2.831127000000 | 0.000000000000  | -1.742976000000 |
| At | 1.415564000000  | -2.451828000000 | -1.742976000000 |
| At | 1.415564000000  | 2.451828000000  | -1.742976000000 |

Frequencies (cm<sup>-1</sup>)

1 20.568  
2 25.292  
3 25.292  
4 111.336  
5 140.622  
6 140.622

**[BkAt<sub>3</sub>]**

|    | X               | Y               | Z              |
|----|-----------------|-----------------|----------------|
| Bk | 0.000000000000  | 0.000000000000  | 0.120316000000 |
| At | -1.432331000000 | 2.480870000000  | 0.847656000000 |
| At | -1.432331000000 | -2.480870000000 | 0.847656000000 |
| At | 2.864662000000  | 0.000000000000  | 0.847656000000 |

Frequencies (cm<sup>-1</sup>)

|   |         |
|---|---------|
| 1 | 17.065  |
| 2 | 21.188  |
| 3 | 21.188  |
| 4 | 104.02  |
| 5 | 138.242 |
| 6 | 138.242 |

**[CfAt<sub>3</sub>]**

|    | X               | Y               | Z              |
|----|-----------------|-----------------|----------------|
| Cf | 0.000000000000  | 0.000000000000  | 0.313364000000 |
| At | -1.444258000000 | 2.501529000000  | 1.023241000000 |
| At | -1.444258000000 | -2.501529000000 | 1.023241000000 |
| At | 2.888516000000  | 0.000000000000  | 1.023241000000 |

Frequencies (cm<sup>-1</sup>)

|   |         |
|---|---------|
| 1 | 12.065  |
| 2 | 12.065  |
| 3 | 15.238  |
| 4 | 97.035  |
| 5 | 129.099 |
| 6 | 129.099 |

**[EsAt<sub>3</sub>]**

|    | X               | Y               | Z               |
|----|-----------------|-----------------|-----------------|
| Es | 0.000000000000  | 0.000000000000  | -1.445951000000 |
| At | -1.475437000000 | 2.555532000000  | -1.889047000000 |
| At | 2.950874000000  | 0.000000000000  | -1.889047000000 |
| At | -1.475437000000 | -2.555532000000 | -1.889047000000 |

Frequencies (cm<sup>-1</sup>)

|   |         |
|---|---------|
| 1 | 8.211   |
| 2 | 8.211   |
| 3 | 12.587  |
| 4 | 87.303  |
| 5 | 125.132 |
| 6 | 125.132 |

**[FmAt<sub>3</sub>]**

| X | Y | Z |
|---|---|---|
|---|---|---|

|    |                 |                 |                |
|----|-----------------|-----------------|----------------|
| Fm | 0.000000000000  | 0.000000000000  | 0.612266000000 |
| At | -1.503918000000 | 2.604863000000  | 0.740056000000 |
| At | -1.503918000000 | -2.604863000000 | 0.740056000000 |
| At | 3.007837000000  | 0.000000000000  | 0.740056000000 |

Frequencies (cm<sup>-1</sup>)

|   |         |
|---|---------|
| 1 | 15.576  |
| 2 | 15.576  |
| 3 | 26.936  |
| 4 | 81.427  |
| 5 | 118.499 |
| 6 | 118.499 |

**[MdAt<sub>3</sub>]**

|    | X               | Y               | Z               |
|----|-----------------|-----------------|-----------------|
| Md | 0.000000000000  | 0.000000000000  | -0.102103000000 |
| At | -1.461159000000 | 2.530802000000  | -0.876383000000 |
| At | -1.461159000000 | -2.530802000000 | -0.876383000000 |
| At | 2.922318000000  | 0.000000000000  | -0.876383000000 |

Frequencies (cm<sup>-1</sup>)

|   |         |
|---|---------|
| 1 | 11.409  |
| 2 | 11.409  |
| 3 | 26.299  |
| 4 | 84.723  |
| 5 | 109.092 |
| 6 | 109.092 |

**[NoAt<sub>3</sub>]**

|    | X               | Y               | Z               |
|----|-----------------|-----------------|-----------------|
| No | 0.000000000000  | 0.000000000000  | -0.708428000000 |
| At | -1.529011000000 | 2.648324000000  | -0.728336000000 |
| At | -1.529011000000 | -2.648324000000 | -0.728336000000 |
| At | 3.058021000000  | 0.000000000000  | -0.728336000000 |

Frequencies (cm<sup>-1</sup>)

|   |         |
|---|---------|
| 1 | 5.587   |
| 2 | 5.587   |
| 3 | 9.144   |
| 4 | 73.882  |
| 5 | 103.075 |
| 6 | 103.075 |

**[LrAt<sub>3</sub>]**

|    | X               | Y               | Z              |
|----|-----------------|-----------------|----------------|
| Lr | 0.000000000000  | 0.000000000000  | 0.429278000000 |
| At | -1.448917000000 | 2.509598000000  | 0.672481000000 |
| At | -1.448917000000 | -2.509598000000 | 0.672481000000 |

At 2.897834000000 0.000000000000 0.672481000000  
 Frequencies (cm<sup>-1</sup>)

1 6.052  
 2 26.258  
 3 26.258  
 4 102.143  
 5 145.844  
 6 145.844

**[AcPO<sub>4</sub>]**

|    | X               | Y               | Z               |
|----|-----------------|-----------------|-----------------|
| P  | 0.000000000000  | 0.000000000000  | -0.510501000000 |
| O  | -1.412059000000 | 0.000000000000  | -1.357943000000 |
| O  | 0.706030000000  | 1.222879000000  | -1.357943000000 |
| O  | 0.706030000000  | -1.222879000000 | -1.357943000000 |
| O  | 0.000000000000  | 0.000000000000  | 0.964822000000  |
| Ac | 0.000000000000  | 0.000000000000  | -3.142995000000 |

Frequencies (cm<sup>-1</sup>)

1 180.006  
 2 180.006  
 3 370.133  
 4 379.352  
 5 379.352  
 6 498.755  
 7 498.755  
 8 620.306  
 9 750.917  
 10 750.917  
 11 774.071  
 12 1301.22

**[ThPO<sub>4</sub>]**

|    | X               | Y               | Z               |
|----|-----------------|-----------------|-----------------|
| P  | 0.000000000000  | 0.000000000000  | -0.482412000000 |
| O  | -1.387506000000 | 0.000000000000  | -1.380846000000 |
| O  | 0.693753000000  | 1.201615000000  | -1.380846000000 |
| O  | 0.693753000000  | -1.201615000000 | -1.380846000000 |
| O  | 0.000000000000  | 0.000000000000  | 0.985983000000  |
| Th | 0.000000000000  | 0.000000000000  | -3.077598000000 |

Frequencies (cm<sup>-1</sup>)

1 164.67  
 2 164.67  
 3 364.777  
 4 364.777  
 5 388.548  
 6 497.459

|    |          |
|----|----------|
| 7  | 497.459  |
| 8  | 632.749  |
| 9  | 753.551  |
| 10 | 753.551  |
| 11 | 776.749  |
| 12 | 1328.335 |

**[PaPO<sub>4</sub>]**

|    | X               | Y               | Z               |
|----|-----------------|-----------------|-----------------|
| P  | 0.000000000000  | 0.000000000000  | -0.468148000000 |
| O  | -1.391044000000 | 0.000000000000  | -1.360863000000 |
| O  | 0.695522000000  | 1.204680000000  | -1.360863000000 |
| O  | 0.695522000000  | -1.204680000000 | -1.360863000000 |
| O  | 0.000000000000  | 0.000000000000  | 0.999442000000  |
| Pa | 0.000000000000  | 0.000000000000  | -3.024308000000 |

Frequencies (cm<sup>-1</sup>)

|    |          |
|----|----------|
| 1  | 157.547  |
| 2  | 157.547  |
| 3  | 359.292  |
| 4  | 359.292  |
| 5  | 375.266  |
| 6  | 489.504  |
| 7  | 489.504  |
| 8  | 639.376  |
| 9  | 756.901  |
| 10 | 756.901  |
| 11 | 772.177  |
| 12 | 1331.703 |

**[UPO<sub>4</sub>]**

|   | X               | Y               | Z               |
|---|-----------------|-----------------|-----------------|
| P | 0.000000000000  | 0.000000000000  | -0.441675000000 |
| O | -1.393765000000 | 0.000000000000  | -1.325460000000 |
| O | 0.696883000000  | 1.207036000000  | -1.325460000000 |
| O | 0.696883000000  | -1.207036000000 | -1.325460000000 |
| O | 0.000000000000  | 0.000000000000  | 1.028794000000  |
| U | 0.000000000000  | 0.000000000000  | -2.985976000000 |

Frequencies (cm<sup>-1</sup>)

|   |         |
|---|---------|
| 1 | 180.14  |
| 2 | 180.14  |
| 3 | 363.546 |
| 4 | 369.761 |
| 5 | 369.761 |
| 6 | 497.229 |
| 7 | 497.229 |
| 8 | 633.578 |
| 9 | 760.924 |

|    |          |
|----|----------|
| 10 | 760.924  |
| 11 | 776.529  |
| 12 | 1320.293 |

**[NpPO<sub>4</sub>]**

|    | X               | Y               | Z               |
|----|-----------------|-----------------|-----------------|
| P  | 0.000000000000  | 0.000000000000  | -0.326323000000 |
| O  | -1.394405000000 | 0.000000000000  | -1.205353000000 |
| O  | 0.697203000000  | 1.207590000000  | -1.205353000000 |
| O  | 0.697203000000  | -1.207590000000 | -1.205353000000 |
| O  | 0.000000000000  | 0.000000000000  | 1.144856000000  |
| Np | 0.000000000000  | 0.000000000000  | -2.862704000000 |

Frequencies (cm<sup>-1</sup>)

|    |          |
|----|----------|
| 1  | 174.182  |
| 2  | 174.182  |
| 3  | 359.631  |
| 4  | 367.194  |
| 5  | 367.194  |
| 6  | 493.701  |
| 7  | 493.701  |
| 8  | 628.587  |
| 9  | 760.294  |
| 10 | 760.294  |
| 11 | 778.478  |
| 12 | 1318.018 |

**[PuPO<sub>4</sub>]**

|    | X               | Y               | Z               |
|----|-----------------|-----------------|-----------------|
| P  | 0.000000000000  | 0.000000000000  | -0.259051000000 |
| O  | -1.391917000000 | 0.000000000000  | -1.135593000000 |
| O  | 0.695959000000  | 1.205436000000  | -1.135593000000 |
| O  | 0.695959000000  | -1.205436000000 | -1.135593000000 |
| O  | 0.000000000000  | 0.000000000000  | 1.213529000000  |
| Pu | 0.000000000000  | 0.000000000000  | -2.795734000000 |

Frequencies (cm<sup>-1</sup>)

|    |          |
|----|----------|
| 1  | 180.2    |
| 2  | 180.2    |
| 3  | 357.884  |
| 4  | 385.606  |
| 5  | 385.606  |
| 6  | 516.764  |
| 7  | 516.764  |
| 8  | 621.663  |
| 9  | 763.81   |
| 10 | 763.81   |
| 11 | 786.585  |
| 12 | 1311.376 |

**[AmPO<sub>4</sub>]**

|    | X               | Y               | Z               |
|----|-----------------|-----------------|-----------------|
| P  | 0.000000000000  | 0.000000000000  | -0.453938000000 |
| O  | -1.396405000000 | 0.000000000000  | -1.318471000000 |
| O  | 0.698203000000  | 1.209323000000  | -1.318471000000 |
| O  | 0.698203000000  | -1.209323000000 | -1.318471000000 |
| O  | 0.000000000000  | 0.000000000000  | 1.020550000000  |
| Am | 0.000000000000  | 0.000000000000  | -2.991968000000 |

Frequencies (cm<sup>-1</sup>)

|    |         |
|----|---------|
| 1  | 209.546 |
| 2  | 209.546 |
| 3  | 360.533 |
| 4  | 393.493 |
| 5  | 393.493 |
| 6  | 504.226 |
| 7  | 504.226 |
| 8  | 625.975 |
| 9  | 779.813 |
| 10 | 779.813 |
| 11 | 792.332 |
| 12 | 1309.26 |

**[CmPO<sub>4</sub>]**

|    | X               | Y               | Z               |
|----|-----------------|-----------------|-----------------|
| P  | 0.000000000000  | 0.000000000000  | -0.478374000000 |
| O  | -1.402654000000 | 0.000000000000  | -1.346222000000 |
| O  | 0.701327000000  | 1.214734000000  | -1.346222000000 |
| O  | 0.701327000000  | -1.214734000000 | -1.346222000000 |
| O  | 0.000000000000  | 0.000000000000  | 0.994501000000  |
| Cm | 0.000000000000  | 0.000000000000  | -2.989759000000 |

Frequencies (cm<sup>-1</sup>)

|    |          |
|----|----------|
| 1  | 181.765  |
| 2  | 181.765  |
| 3  | 363.759  |
| 4  | 375.797  |
| 5  | 375.797  |
| 6  | 493.005  |
| 7  | 493.005  |
| 8  | 630.167  |
| 9  | 753.168  |
| 10 | 753.168  |
| 11 | 776.139  |
| 12 | 1310.336 |

**[BkPO<sub>4</sub>]**

|    | X               | Y               | Z               |
|----|-----------------|-----------------|-----------------|
| P  | 0.000000000000  | 0.000000000000  | -0.465851000000 |
| O  | -1.403971000000 | 0.000000000000  | -1.330415000000 |
| O  | 0.701985000000  | 1.215874000000  | -1.330415000000 |
| O  | 0.701985000000  | -1.215874000000 | -1.330415000000 |
| O  | 0.000000000000  | 0.000000000000  | 1.007470000000  |
| Bk | 0.000000000000  | 0.000000000000  | -2.957216000000 |

Frequencies (cm<sup>-1</sup>)

|    |          |
|----|----------|
| 1  | 184.804  |
| 2  | 184.804  |
| 3  | 346.143  |
| 4  | 376.933  |
| 5  | 376.933  |
| 6  | 486.279  |
| 7  | 486.279  |
| 8  | 622.356  |
| 9  | 753.078  |
| 10 | 753.078  |
| 11 | 773.972  |
| 12 | 1304.375 |

#### [CfPO<sub>4</sub>]

|    | X               | Y               | Z               |
|----|-----------------|-----------------|-----------------|
| P  | 0.000000000000  | 0.000000000000  | -0.454015000000 |
| O  | -1.399854000000 | 0.000000000000  | -1.314515000000 |
| O  | 0.699927000000  | 1.212309000000  | -1.314515000000 |
| O  | 0.699927000000  | -1.212309000000 | -1.314515000000 |
| O  | 0.000000000000  | 0.000000000000  | 1.021284000000  |
| Cf | 0.000000000000  | 0.000000000000  | -2.953070000000 |

Frequencies (cm<sup>-1</sup>)

|    |          |
|----|----------|
| 1  | 186.57   |
| 2  | 186.57   |
| 3  | 335.767  |
| 4  | 369.574  |
| 5  | 369.574  |
| 6  | 474.464  |
| 7  | 474.464  |
| 8  | 594.262  |
| 9  | 751.106  |
| 10 | 751.106  |
| 11 | 784.872  |
| 12 | 1282.667 |

#### [EsPO<sub>4</sub>]

|   | X              | Y              | Z               |
|---|----------------|----------------|-----------------|
| P | 0.000000000000 | 0.000000000000 | -0.640993000000 |



|    |                 |                 |                 |
|----|-----------------|-----------------|-----------------|
| O  | -1.396351000000 | 0.000000000000  | -1.498113000000 |
| O  | 0.698175000000  | 1.209275000000  | -1.498113000000 |
| O  | 0.698175000000  | -1.209275000000 | -1.498113000000 |
| O  | 0.000000000000  | 0.000000000000  | 0.834305000000  |
| Es | 0.000000000000  | 0.000000000000  | -3.160617000000 |

Frequencies (cm<sup>-1</sup>)

|    |          |
|----|----------|
| 1  | 197.606  |
| 2  | 197.606  |
| 3  | 319.427  |
| 4  | 380.931  |
| 5  | 380.931  |
| 6  | 462.432  |
| 7  | 462.432  |
| 8  | 585.312  |
| 9  | 747.384  |
| 10 | 747.384  |
| 11 | 786.294  |
| 12 | 1283.496 |

### [FmPO<sub>4</sub>]

|    | X               | Y               | Z               |
|----|-----------------|-----------------|-----------------|
| P  | 0.000000000000  | 0.000000000000  | -0.480624000000 |
| O  | -1.393744000000 | 0.000000000000  | -1.329778000000 |
| O  | 0.696872000000  | 1.207018000000  | -1.329778000000 |
| O  | 0.696872000000  | -1.207018000000 | -1.329778000000 |
| O  | 0.000000000000  | 0.000000000000  | 0.995711000000  |
| Fm | 0.000000000000  | 0.000000000000  | -3.015974000000 |

Frequencies (cm<sup>-1</sup>)

|    |          |
|----|----------|
| 1  | 195.583  |
| 2  | 195.583  |
| 3  | 295.112  |
| 4  | 377.179  |
| 5  | 377.179  |
| 6  | 441.353  |
| 7  | 441.353  |
| 8  | 564.892  |
| 9  | 747.505  |
| 10 | 747.505  |
| 11 | 792.494  |
| 12 | 1272.111 |

### [MdPO<sub>4</sub>]

|   | X               | Y               | Z               |
|---|-----------------|-----------------|-----------------|
| P | 0.000000000000  | 0.000000000000  | -0.411890000000 |
| O | -1.400766000000 | 0.000000000000  | -1.218562000000 |
| O | 0.700383000000  | 1.213099000000  | -1.218562000000 |
| O | 0.700383000000  | -1.213099000000 | -1.218562000000 |

|    |                |                |                 |
|----|----------------|----------------|-----------------|
| O  | 0.000000000000 | 0.000000000000 | 1.078241000000  |
| Md | 0.000000000000 | 0.000000000000 | -2.954691000000 |

Frequencies (cm<sup>-1</sup>)

|    |          |
|----|----------|
| 1  | 179.849  |
| 2  | 179.849  |
| 3  | 276.543  |
| 4  | 376.602  |
| 5  | 376.602  |
| 6  | 486.596  |
| 7  | 744.121  |
| 8  | 744.121  |
| 9  | 810.278  |
| 10 | 1158.565 |
| 11 | 1407.898 |
| 12 | 1407.898 |

**[NoPO<sub>4</sub>]**

|    | X               | Y               | Z               |
|----|-----------------|-----------------|-----------------|
| P  | 0.100119000000  | 0.443168000000  | 0.000000000000  |
| O  | -0.646953000000 | -0.423285000000 | 1.166341000000  |
| O  | -0.646953000000 | -0.423285000000 | -1.166341000000 |
| O  | 1.532783000000  | -0.280299000000 | 0.000000000000  |
| O  | -0.000778000000 | 1.918773000000  | 0.000000000000  |
| No | 0.311226000000  | -2.174316000000 | 0.000000000000  |

Frequencies (cm<sup>-1</sup>)

|    |          |
|----|----------|
| 1  | 119.901  |
| 2  | 151.801  |
| 3  | 256.145  |
| 4  | 273.588  |
| 5  | 343.392  |
| 6  | 393.966  |
| 7  | 413.58   |
| 8  | 546.945  |
| 9  | 690.647  |
| 10 | 767.829  |
| 11 | 803.316  |
| 12 | 1228.305 |

**[LrPO<sub>4</sub>]**

|    | X               | Y               | Z               |
|----|-----------------|-----------------|-----------------|
| P  | 0.000000000000  | 0.000000000000  | -0.421162000000 |
| O  | -1.415154000000 | 0.000000000000  | -1.287852000000 |
| O  | 0.707577000000  | 1.225560000000  | -1.287852000000 |
| O  | 0.707577000000  | -1.225560000000 | -1.287852000000 |
| O  | 0.000000000000  | 0.000000000000  | 1.052913000000  |
| Lr | 0.000000000000  | 0.000000000000  | -2.860903000000 |

Frequencies (cm<sup>-1</sup>)

|    |          |
|----|----------|
| 1  | 210.753  |
| 2  | 210.753  |
| 3  | 370.922  |
| 4  | 392.383  |
| 5  | 392.383  |
| 6  | 493.65   |
| 7  | 493.65   |
| 8  | 639.905  |
| 9  | 730.769  |
| 10 | 730.769  |
| 11 | 765.494  |
| 12 | 1306.459 |

**[AcAsO<sub>4</sub>]**

|    | X               | Y               | Z               |
|----|-----------------|-----------------|-----------------|
| As | 0.000000000000  | 0.000000000000  | -0.427084000000 |
| O  | -1.503838000000 | 0.000000000000  | -1.445948000000 |
| O  | 0.751919000000  | 1.302362000000  | -1.445948000000 |
| O  | 0.751919000000  | -1.302362000000 | -1.445948000000 |
| O  | 0.000000000000  | 0.000000000000  | 1.202586000000  |
| Ac | 0.000000000000  | 0.000000000000  | -3.168946000000 |

Frequencies (cm<sup>-1</sup>)

|    |         |
|----|---------|
| 1  | 142.139 |
| 2  | 142.139 |
| 3  | 285.088 |
| 4  | 311.411 |
| 5  | 311.411 |
| 6  | 370.255 |
| 7  | 370.255 |
| 8  | 541.385 |
| 9  | 600.184 |
| 10 | 600.184 |
| 11 | 641.712 |
| 12 | 951.753 |

**[UAsO<sub>4</sub>]**

|    | X               | Y               | Z               |
|----|-----------------|-----------------|-----------------|
| As | 0.000000000000  | 0.000000000000  | -0.349858000000 |
| O  | -1.477853000000 | 0.000000000000  | -1.416143000000 |
| O  | 0.738927000000  | 1.279858000000  | -1.416143000000 |
| O  | 0.738927000000  | -1.279858000000 | -1.416143000000 |
| O  | 0.000000000000  | 0.000000000000  | 1.276130000000  |
| U  | 0.000000000000  | 0.000000000000  | -3.013213000000 |

Frequencies (cm<sup>-1</sup>)

|   |         |
|---|---------|
| 1 | 128.069 |
| 2 | 128.069 |
| 3 | 281.752 |

|    |         |
|----|---------|
| 4  | 294.449 |
| 5  | 294.449 |
| 6  | 373.208 |
| 7  | 373.208 |
| 8  | 551.171 |
| 9  | 612.556 |
| 10 | 612.556 |
| 11 | 653.773 |
| 12 | 959.719 |

**[NpAsO<sub>4</sub>]**

|    | X               | Y               | Z               |
|----|-----------------|-----------------|-----------------|
| As | 0.000000000000  | 0.000000000000  | -0.240478000000 |
| O  | -1.479464000000 | 0.000000000000  | -1.303546000000 |
| O  | 0.739732000000  | 1.281253000000  | -1.303546000000 |
| O  | 0.739732000000  | -1.281253000000 | -1.303546000000 |
| O  | 0.000000000000  | 0.000000000000  | 1.387763000000  |
| Np | 0.000000000000  | 0.000000000000  | -2.886354000000 |

Frequencies (cm<sup>-1</sup>)

|    |         |
|----|---------|
| 1  | 132.769 |
| 2  | 132.769 |
| 3  | 271.19  |
| 4  | 292.755 |
| 5  | 292.755 |
| 6  | 372.255 |
| 7  | 372.255 |
| 8  | 537.328 |
| 9  | 612.689 |
| 10 | 612.689 |
| 11 | 652.053 |
| 12 | 953.202 |

**[PuAsO<sub>4</sub>]**

|    | X               | Y               | Z               |
|----|-----------------|-----------------|-----------------|
| As | 0.000000000000  | 0.000000000000  | -0.171592000000 |
| O  | -1.475128000000 | 0.000000000000  | -1.232119000000 |
| O  | 0.737564000000  | 1.277498000000  | -1.232119000000 |
| O  | 0.737564000000  | -1.277498000000 | -1.232119000000 |
| O  | 0.000000000000  | 0.000000000000  | 1.457734000000  |
| Pu | 0.000000000000  | 0.000000000000  | -2.819615000000 |

Frequencies (cm<sup>-1</sup>)

|   |         |
|---|---------|
| 1 | 139.526 |
| 2 | 139.526 |
| 3 | 274.344 |
| 4 | 304.864 |
| 5 | 304.864 |
| 6 | 375.653 |

|    |         |
|----|---------|
| 7  | 375.653 |
| 8  | 538.637 |
| 9  | 616.056 |
| 10 | 616.056 |
| 11 | 661.175 |
| 12 | 951.69  |

**[AmAsO<sub>4</sub>]**

|    | X               | Y               | Z               |
|----|-----------------|-----------------|-----------------|
| As | 0.000000000000  | 0.000000000000  | -0.367639000000 |
| O  | -1.481324000000 | 0.000000000000  | -1.418975000000 |
| O  | 0.740662000000  | 1.282864000000  | -1.418975000000 |
| O  | 0.740662000000  | -1.282864000000 | -1.418975000000 |
| O  | 0.000000000000  | 0.000000000000  | 1.261666000000  |
| Am | 0.000000000000  | 0.000000000000  | -3.014581000000 |

Frequencies (cm<sup>-1</sup>)

|    |         |
|----|---------|
| 1  | 158.059 |
| 2  | 158.059 |
| 3  | 278.395 |
| 4  | 325.727 |
| 5  | 325.727 |
| 6  | 379.331 |
| 7  | 379.331 |
| 8  | 541.869 |
| 9  | 624.437 |
| 10 | 624.437 |
| 11 | 661.964 |
| 12 | 952.464 |

**[CmAsO<sub>4</sub>]**

|    | X               | Y               | Z               |
|----|-----------------|-----------------|-----------------|
| As | 0.000000000000  | 0.000000000000  | -0.396153000000 |
| O  | -1.489665000000 | 0.000000000000  | -1.443834000000 |
| O  | 0.744833000000  | 1.290088000000  | -1.443834000000 |
| O  | 0.744833000000  | -1.290088000000 | -1.443834000000 |
| O  | 0.000000000000  | 0.000000000000  | 1.231769000000  |
| Cm | 0.000000000000  | 0.000000000000  | -3.014996000000 |

Frequencies (cm<sup>-1</sup>)

|   |         |
|---|---------|
| 1 | 140.567 |
| 2 | 140.567 |
| 3 | 280.604 |
| 4 | 305.714 |
| 5 | 305.714 |
| 6 | 369.698 |
| 7 | 369.698 |
| 8 | 545.258 |
| 9 | 611.951 |

10 611.951  
 11 655.525  
 12 955.348

**[BkAsO<sub>4</sub>]**

|    | X               | Y               | Z               |
|----|-----------------|-----------------|-----------------|
| As | 0.000000000000  | 0.000000000000  | -0.383001000000 |
| O  | -1.491782000000 | 0.000000000000  | -1.429124000000 |
| O  | 0.745891000000  | 1.291921000000  | -1.429124000000 |
| O  | 0.745891000000  | -1.291921000000 | -1.429124000000 |
| O  | 0.000000000000  | 0.000000000000  | 1.244926000000  |
| Bk | 0.000000000000  | 0.000000000000  | -2.978547000000 |

Frequencies (cm<sup>-1</sup>)

1 142.198  
 2 142.198  
 3 269.049  
 4 305.966  
 5 305.966  
 6 365.755  
 7 365.755  
 8 540.073  
 9 612.579  
 10 612.579  
 11 653.595  
 12 954.601

**[CfAsO<sub>4</sub>]**

|    | X               | Y               | Z               |
|----|-----------------|-----------------|-----------------|
| As | 0.000000000000  | 0.000000000000  | -0.360504000000 |
| O  | -1.482991000000 | 0.000000000000  | -1.410643000000 |
| O  | 0.741496000000  | 1.284308000000  | -1.410643000000 |
| O  | 0.741496000000  | -1.284308000000 | -1.410643000000 |
| O  | 0.000000000000  | 0.000000000000  | 1.269536000000  |
| Cf | 0.000000000000  | 0.000000000000  | -2.978425000000 |

Frequencies (cm<sup>-1</sup>)

1 163.075  
 2 163.075  
 3 268.576  
 4 316.587  
 5 316.587  
 6 366.721  
 7 366.721  
 8 521.573  
 9 607.776  
 10 607.776  
 11 661.139  
 12 949.986

**[EsAsO<sub>4</sub>]**

|    | X               | Y               | Z               |
|----|-----------------|-----------------|-----------------|
| As | 0.000000000000  | 0.000000000000  | -0.558785000000 |
| O  | -1.484467000000 | 0.000000000000  | -1.605408000000 |
| O  | 0.742233000000  | 1.285586000000  | -1.605408000000 |
| O  | 0.742233000000  | -1.285586000000 | -1.605408000000 |
| O  | 0.000000000000  | 0.000000000000  | 1.070812000000  |
| Es | 0.000000000000  | 0.000000000000  | -3.179639000000 |

Frequencies (cm<sup>-1</sup>)

|    |         |
|----|---------|
| 1  | 159.924 |
| 2  | 159.924 |
| 3  | 257.648 |
| 4  | 306.618 |
| 5  | 306.618 |
| 6  | 358.446 |
| 7  | 358.446 |
| 8  | 508.422 |
| 9  | 599.688 |
| 10 | 599.688 |
| 11 | 653.267 |
| 12 | 949.781 |

**[FmAsO<sub>4</sub>]**

|    | X               | Y               | Z               |
|----|-----------------|-----------------|-----------------|
| As | 0.000000000000  | 0.000000000000  | -0.397491000000 |
| O  | -1.480395000000 | 0.000000000000  | -1.438568000000 |
| O  | 0.740197000000  | 1.282060000000  | -1.438568000000 |
| O  | 0.740197000000  | -1.282060000000 | -1.438568000000 |
| O  | 0.000000000000  | 0.000000000000  | 1.232750000000  |
| Fm | 0.000000000000  | 0.000000000000  | -3.034649000000 |

Frequencies (cm<sup>-1</sup>)

|    |         |
|----|---------|
| 1  | 159.309 |
| 2  | 159.309 |
| 3  | 242.231 |
| 4  | 300.917 |
| 5  | 300.917 |
| 6  | 343.493 |
| 7  | 343.493 |
| 8  | 491.455 |
| 9  | 589.793 |
| 10 | 589.793 |
| 11 | 657.401 |
| 12 | 948.692 |

**[MdAsO<sub>4</sub>]**

| X | Y | Z |
|---|---|---|
|---|---|---|

|    |                 |                 |                 |
|----|-----------------|-----------------|-----------------|
| As | 0.000000000000  | 0.000000000000  | -0.332590000000 |
| O  | -1.489700000000 | 0.000000000000  | -1.347002000000 |
| O  | 0.744850000000  | 1.290118000000  | -1.347002000000 |
| O  | 0.744850000000  | -1.290118000000 | -1.347002000000 |
| O  | 0.000000000000  | 0.000000000000  | 1.298441000000  |
| Md | 0.000000000000  | 0.000000000000  | -3.009051000000 |

Frequencies (cm<sup>-1</sup>)

|    |         |
|----|---------|
| 1  | 142.376 |
| 2  | 142.376 |
| 3  | 222.613 |
| 4  | 314.03  |
| 5  | 314.03  |
| 6  | 426.793 |
| 7  | 580.095 |
| 8  | 580.095 |
| 9  | 655.601 |
| 10 | 745.757 |
| 11 | 745.757 |
| 12 | 923.583 |

**[NoAsO<sub>4</sub>]**

|    | X               | Y               | Z               |
|----|-----------------|-----------------|-----------------|
| As | 0.118521000000  | 0.526166000000  | 0.000000000000  |
| O  | -0.741910000000 | -0.542754000000 | 1.197756000000  |
| O  | -0.741910000000 | -0.542754000000 | -1.197756000000 |
| O  | 1.641128000000  | -0.349266000000 | 0.000000000000  |
| O  | -0.029311000000 | 2.151298000000  | 0.000000000000  |
| No | 0.312702000000  | -2.193670000000 | 0.000000000000  |

Frequencies (cm<sup>-1</sup>)

|    |         |
|----|---------|
| 1  | 145.309 |
| 2  | 147.776 |
| 3  | 199.491 |
| 4  | 217.239 |
| 5  | 277.392 |
| 6  | 314.044 |
| 7  | 336.035 |
| 8  | 454.557 |
| 9  | 510.204 |
| 10 | 610.07  |
| 11 | 676.621 |
| 12 | 942.175 |

**[LrAsO<sub>4</sub>]**

|    | X               | Y               | Z               |
|----|-----------------|-----------------|-----------------|
| As | 0.000000000000  | 0.000000000000  | -0.335779000000 |
| O  | -1.502753000000 | 0.000000000000  | -1.385101000000 |
| O  | 0.751377000000  | 1.301422000000  | -1.385101000000 |
| O  | 0.751377000000  | -1.301422000000 | -1.385101000000 |



|    |                |                |                 |
|----|----------------|----------------|-----------------|
| O  | 0.000000000000 | 0.000000000000 | 1.292168000000  |
| Lr | 0.000000000000 | 0.000000000000 | -2.882278000000 |

Frequencies (cm<sup>-1</sup>)

|    |         |
|----|---------|
| 1  | 165.018 |
| 2  | 165.018 |
| 3  | 288.302 |
| 4  | 329.416 |
| 5  | 329.416 |
| 6  | 371.123 |
| 7  | 371.123 |
| 8  | 541.142 |
| 9  | 606.386 |
| 10 | 606.386 |
| 11 | 657.853 |
| 12 | 954.117 |

Cartesian Coordinates (Angstroms) of Optimized Geometries (SO)

**[AcF<sub>3</sub>]**

|    | X               | Y               | Z               |
|----|-----------------|-----------------|-----------------|
| Ac | 0.000000000000  | 0.000000000000  | -0.356729000000 |
| F  | -1.036568000000 | -1.795388000000 | 0.348711000000  |
| F  | 2.073136000000  | 0.000000000000  | 0.348711000000  |
| F  | -1.036568000000 | 1.795388000000  | 0.348711000000  |

**[ThF<sub>3</sub>]**

|    | X               | Y               | Z               |
|----|-----------------|-----------------|-----------------|
| Th | -0.515143000000 | 0.474377000000  | 0.103253000000  |
| F  | 0.190661000000  | -1.083261000000 | -1.118593000000 |
| F  | -2.429714000000 | 1.278342000000  | -0.221423000000 |
| F  | 0.652697000000  | 1.159628000000  | 1.710696000000  |

**[PaF<sub>3</sub>]**

|    | X               | Y               | Z               |
|----|-----------------|-----------------|-----------------|
| Pa | -0.442581000000 | 0.594330000000  | -0.003641000000 |
| F  | -0.116400000000 | -1.335242000000 | -0.657879000000 |
| F  | -2.487935000000 | 0.804951000000  | 0.164549000000  |
| F  | 0.302255000000  | 0.705739000000  | 1.915163000000  |

**[UF<sub>3</sub>]**

|   | X               | Y               | Z               |
|---|-----------------|-----------------|-----------------|
| U | -0.524738000000 | 0.561847000000  | -0.567199000000 |
| F | -2.352663000000 | -0.296662000000 | -0.170829000000 |
| F | 0.754913000000  | -0.833204000000 | 0.241797000000  |
| F | -0.313395000000 | 0.267016000000  | -2.595003000000 |

**[NpF<sub>3</sub>]**

|    | X               | Y               | Z               |
|----|-----------------|-----------------|-----------------|
| Np | -0.719035000000 | -1.032643000000 | 0.086792000000  |
| F  | -2.484552000000 | -2.066417000000 | -0.152826000000 |
| F  | 0.689369000000  | -2.516374000000 | -0.154425000000 |
| F  | -0.671026000000 | -0.704473000000 | 2.120093000000  |

**[PuF<sub>3</sub>]**

|    | X               | Y               | Z               |
|----|-----------------|-----------------|-----------------|
| Pu | -1.237476000000 | -0.075693000000 | 0.246792000000  |
| F  | -1.503266000000 | -2.012186000000 | -0.418696000000 |
| F  | 0.107517000000  | 0.810628000000  | -1.044454000000 |
| F  | -3.042656000000 | 0.889905000000  | -0.036691000000 |

**[AmF<sub>3</sub>]**

|    | X               | Y               | Z               |
|----|-----------------|-----------------|-----------------|
| Am | -0.493623000000 | -0.032977000000 | 0.051560000000  |
| F  | 0.669101000000  | -1.686415000000 | -0.368379000000 |
| F  | -2.093208000000 | -0.687528000000 | 1.187735000000  |
| F  | 0.633166000000  | 1.204606000000  | 1.267082000000  |

**[CmF<sub>3</sub>]**

|    | X               | Y               | Z               |
|----|-----------------|-----------------|-----------------|
| Cm | -0.649021000000 | -0.479265000000 | -0.720772000000 |
| F  | -2.483457000000 | -1.073344000000 | 0.002841000000  |
| F  | 0.726062000000  | -1.745973000000 | 0.143118000000  |
| F  | -0.660706000000 | -0.951995000000 | -2.725383000000 |

**[BkF<sub>3</sub>]**

|    | X               | Y               | Z               |
|----|-----------------|-----------------|-----------------|
| Bk | 0.055064000000  | 0.097512000000  | -0.131878000000 |
| F  | -1.670687000000 | 0.976227000000  | 0.521290000000  |
| F  | -0.438308000000 | -1.854457000000 | -0.479148000000 |
| F  | 1.232022000000  | 0.061044000000  | 1.539184000000  |

**[CfF<sub>3</sub>]**

|    | X               | Y               | Z               |
|----|-----------------|-----------------|-----------------|
| Cf | 0.031991000000  | 0.072957000000  | -0.084774000000 |
| F  | -1.696574000000 | 1.029403000000  | 0.444340000000  |
| F  | -0.425740000000 | -1.862684000000 | -0.557373000000 |
| F  | 1.320527000000  | 0.091162000000  | 1.502330000000  |

**[EsF<sub>3</sub>]**

|    | X               | Y               | Z               |
|----|-----------------|-----------------|-----------------|
| Es | -0.486284000000 | -0.036169000000 | -0.118589000000 |
| F  | -1.788444000000 | 1.500058000000  | 0.237367000000  |
| F  | 0.147162000000  | 0.007164000000  | -2.056827000000 |
| F  | -1.382877000000 | -1.825113000000 | 0.302961000000  |

**[FmF<sub>3</sub>]**

|    | X               | Y               | Z               |
|----|-----------------|-----------------|-----------------|
| Fm | 0.100874000000  | 0.019725000000  | -0.182165000000 |
| F  | -1.829402000000 | 0.414120000000  | 0.330787000000  |
| F  | 0.196048000000  | -1.950304000000 | -0.691542000000 |
| F  | 1.253072000000  | 0.281099000000  | 1.480521000000  |

**[MdF<sub>3</sub>]**

|    | X               | Y               | Z               |
|----|-----------------|-----------------|-----------------|
| Md | -0.430015000000 | 0.072282000000  | 0.403923000000  |
| F  | -1.421363000000 | 1.871084000000  | 0.314544000000  |
| F  | -0.260369000000 | -1.025760000000 | -1.317906000000 |
| F  | -1.072754000000 | -1.196107000000 | 1.870778000000  |

**[LrF<sub>3</sub>]**

|    | X               | Y               | Z               |
|----|-----------------|-----------------|-----------------|
| Lr | 0.000000000000  | 0.000000000000  | -0.053137000000 |
| F  | -0.946098000000 | 1.638690000000  | 0.640528000000  |
| F  | -0.946098000000 | -1.638690000000 | 0.640528000000  |
| F  | 1.892196000000  | 0.000000000000  | 0.640528000000  |

**[AcCl<sub>3</sub>]**

|    | X               | Y               | Z               |
|----|-----------------|-----------------|-----------------|
| Ac | 0.000000000000  | 0.000000000000  | -0.358249000000 |
| Cl | -1.282533000000 | -2.221413000000 | 0.362581000000  |
| Cl | 2.565067000000  | 0.000000000000  | 0.362581000000  |
| Cl | -1.282533000000 | 2.221413000000  | 0.362581000000  |

**[ThCl<sub>3</sub>]**

|    | X               | Y               | Z               |
|----|-----------------|-----------------|-----------------|
| Th | 0.144828000000  | -0.581069000000 | -0.512628000000 |
| Cl | 0.209754000000  | -3.126251000000 | -0.277464000000 |
| Cl | -2.088389000000 | 0.607977000000  | -0.880905000000 |
| Cl | 2.313931000000  | 0.767059000000  | -0.397414000000 |

**[PaCl<sub>3</sub>]**

|  | X | Y | Z |
|--|---|---|---|
|--|---|---|---|

|    |                 |                 |                 |
|----|-----------------|-----------------|-----------------|
| Pa | -0.449730000000 | 0.583083000000  | 0.006583000000  |
| Cl | 0.059498000000  | -1.693797000000 | -0.952434000000 |
| Cl | -2.935221000000 | 1.006528000000  | 0.075920000000  |
| Cl | 0.588898000000  | 0.873911000000  | 2.286319000000  |

**[UCl<sub>3</sub>]**

|    | X               | Y               | Z               |
|----|-----------------|-----------------|-----------------|
| U  | -0.526402000000 | 0.551416000000  | -0.569568000000 |
| Cl | -2.805166000000 | -0.357993000000 | -0.036665000000 |
| Cl | 1.112930000000  | -1.034910000000 | 0.478249000000  |
| Cl | -0.239884000000 | 0.325579000000  | -3.053498000000 |

**[NpCl<sub>3</sub>]**

|    | X               | Y               | Z               |
|----|-----------------|-----------------|-----------------|
| Np | -0.720880000000 | -1.044707000000 | 0.095760000000  |
| Cl | -2.914151000000 | -2.189936000000 | -0.312716000000 |
| Cl | 1.066837000000  | -2.753242000000 | -0.312728000000 |
| Cl | -0.637872000000 | -0.483623000000 | 2.536555000000  |

**[PuCl<sub>3</sub>]**

|    | X               | Y               | Z               |
|----|-----------------|-----------------|-----------------|
| Pu | -1.239550000000 | -0.076730000000 | 0.236832000000  |
| Cl | -1.526961000000 | -2.468829000000 | -0.436718000000 |
| Cl | 0.469754000000  | 1.032673000000  | -1.213003000000 |
| Cl | -3.424994000000 | 1.123997000000  | 0.031735000000  |

**[AmCl<sub>3</sub>]**

|    | X               | Y               | Z               |
|----|-----------------|-----------------|-----------------|
| Am | -0.478112000000 | -0.059597000000 | 0.149837000000  |
| Cl | 0.902217000000  | -2.012058000000 | -0.571855000000 |
| Cl | -2.566956000000 | -0.904784000000 | 1.253372000000  |
| Cl | 0.999280000000  | 1.570808000000  | 1.356001000000  |

**[CmCl<sub>3</sub>]**

|    | X               | Y               | Z               |
|----|-----------------|-----------------|-----------------|
| Cm | -0.649048000000 | -0.479358000000 | -0.720719000000 |
| Cl | -2.879251000000 | -1.072900000000 | 0.193892000000  |
| Cl | 1.071409000000  | -1.900902000000 | 0.366449000000  |
| Cl | -0.635677000000 | -0.924173000000 | -3.163291000000 |

**[BkCl<sub>3</sub>]**

|    | X              | Y              | Z               |
|----|----------------|----------------|-----------------|
| Bk | 0.054915000000 | 0.095690000000 | -0.131048000000 |

|    |                 |                 |                 |
|----|-----------------|-----------------|-----------------|
| Cl | -2.019176000000 | 1.243967000000  | 0.551507000000  |
| Cl | -0.498737000000 | -2.245828000000 | -0.675361000000 |
| Cl | 1.576362000000  | 0.117181000000  | 1.813466000000  |

**[CfCl<sub>3</sub>]**

|    | X               | Y               | Z               |
|----|-----------------|-----------------|-----------------|
| Cf | 0.020172000000  | 0.056322000000  | -0.059327000000 |
| Cl | -2.035103000000 | 1.329760000000  | 0.457644000000  |
| Cl | -0.470930000000 | -2.252262000000 | -0.793470000000 |
| Cl | 1.673541000000  | 0.168218000000  | 1.773469000000  |

**[EsCl<sub>3</sub>]**

|    | X               | Y               | Z               |
|----|-----------------|-----------------|-----------------|
| Es | -0.530648000000 | -0.042545000000 | -0.158728000000 |
| Cl | -1.933140000000 | 1.888993000000  | 0.487159000000  |
| Cl | 0.514553000000  | 0.045826000000  | -2.398232000000 |
| Cl | -1.431286000000 | -2.228173000000 | 0.567644000000  |

**[FmCl<sub>3</sub>]**

|    | X               | Y               | Z               |
|----|-----------------|-----------------|-----------------|
| Fm | 0.008352000000  | 0.042231000000  | -0.034056000000 |
| Cl | -2.048381000000 | 1.332581000000  | 0.448124000000  |
| Cl | -0.482596000000 | -2.258053000000 | -0.811057000000 |
| Cl | 1.703590000000  | 0.186567000000  | 1.767186000000  |

**[MdCl<sub>3</sub>]**

|    | X               | Y               | Z               |
|----|-----------------|-----------------|-----------------|
| Md | -0.075074000000 | -0.038162000000 | 0.109145000000  |
| Cl | -1.932091000000 | 1.627570000000  | 0.091824000000  |
| Cl | -0.259064000000 | -2.149300000000 | -1.207938000000 |
| Cl | 1.982924000000  | 0.380099000000  | 1.456756000000  |

**[NoCl<sub>3</sub>]**

|    | X               | Y               | Z               |
|----|-----------------|-----------------|-----------------|
| No | -0.051796000000 | -0.016654000000 | 0.069804000000  |
| Cl | -2.001022000000 | 1.587376000000  | 0.184202000000  |
| Cl | -0.324417000000 | -2.222658000000 | -1.132653000000 |
| Cl | 1.950825000000  | 0.340780000000  | 1.569300000000  |

**[LrCl<sub>3</sub>]**

|    | X               | Y              | Z               |
|----|-----------------|----------------|-----------------|
| Lr | 0.000000000000  | 0.000000000000 | -0.057065000000 |
| Cl | -1.168644000000 | 2.024150000000 | 0.605204000000  |

|    |                 |                 |                |
|----|-----------------|-----------------|----------------|
| Cl | -1.168644000000 | -2.024150000000 | 0.605204000000 |
| Cl | 2.337287000000  | 0.000000000000  | 0.605204000000 |

**[AcBr<sub>3</sub>]**

|    | X               | Y               | Z              |
|----|-----------------|-----------------|----------------|
| Ac | 0.000000000000  | 0.000000000000  | 0.389759000000 |
| Br | -1.366396000000 | -2.366667000000 | 1.105348000000 |
| Br | 2.732792000000  | 0.000000000000  | 1.105348000000 |
| Br | -1.366396000000 | 2.366667000000  | 1.105348000000 |

**[ThBr<sub>3</sub>]**

|    | X               | Y               | Z               |
|----|-----------------|-----------------|-----------------|
| Th | -0.697363000000 | -1.029091000000 | 0.063315000000  |
| Br | -3.319134000000 | -1.662617000000 | 0.347286000000  |
| Br | 0.598031000000  | -1.618220000000 | -2.245458000000 |
| Br | 0.629661000000  | 0.191303000000  | 2.089432000000  |

**[PaBr<sub>3</sub>]**

|    | X               | Y               | Z               |
|----|-----------------|-----------------|-----------------|
| Pa | -0.482335000000 | 0.531327000000  | 0.052660000000  |
| Br | 0.135747000000  | -1.827850000000 | -1.071348000000 |
| Br | -3.108542000000 | 1.093764000000  | 0.035639000000  |
| Br | 0.706969000000  | 0.943838000000  | 2.425262000000  |

**[UBr<sub>3</sub>]**

|    | X               | Y               | Z               |
|----|-----------------|-----------------|-----------------|
| U  | -0.532731000000 | 0.503233000000  | -0.585115000000 |
| Br | -2.986246000000 | -0.376444000000 | 0.021225000000  |
| Br | 1.257394000000  | -1.109859000000 | 0.578695000000  |
| Br | -0.209798000000 | 0.358478000000  | -3.237393000000 |

**[NpBr<sub>3</sub>]**

|    | X               | Y               | Z               |
|----|-----------------|-----------------|-----------------|
| Np | -0.724056000000 | -1.072227000000 | 0.120006000000  |
| Br | -3.067075000000 | -2.248706000000 | -0.367284000000 |
| Br | 1.198589000000  | -2.854041000000 | -0.369940000000 |
| Br | -0.628900000000 | -0.408013000000 | 2.698069000000  |

**[PuBr<sub>3</sub>]**

|    | X               | Y               | Z               |
|----|-----------------|-----------------|-----------------|
| Pu | -1.249833000000 | -0.078472000000 | 0.201833000000  |
| Br | -1.538040000000 | -2.638340000000 | -0.461717000000 |
| Br | 0.600275000000  | 1.110894000000  | -1.293052000000 |

|    |                 |                |                |
|----|-----------------|----------------|----------------|
| Br | -3.572054000000 | 1.209996000000 | 0.042356000000 |
|----|-----------------|----------------|----------------|

**[AmBr<sub>3</sub>]**

|    | X               | Y               | Z               |
|----|-----------------|-----------------|-----------------|
| Am | -0.381722000000 | -1.549128000000 | -0.353671000000 |
| Br | -0.935692000000 | -1.185923000000 | -2.939270000000 |
| Br | 2.237606000000  | -1.442973000000 | 0.137417000000  |
| Br | -1.705740000000 | -3.669175000000 | 0.574742000000  |

**[CmBr<sub>3</sub>]**

|    | X               | Y               | Z               |
|----|-----------------|-----------------|-----------------|
| Cm | -0.664494000000 | -0.554199000000 | -0.733626000000 |
| Br | -3.042898000000 | -1.114264000000 | 0.260830000000  |
| Br | 1.198482000000  | -2.003347000000 | 0.444704000000  |
| Br | -0.633403000000 | -0.955835000000 | -3.341440000000 |

**[BkBr<sub>3</sub>]**

|    | X               | Y               | Z               |
|----|-----------------|-----------------|-----------------|
| Bk | 0.024235000000  | 0.058699000000  | -0.072504000000 |
| Br | -2.173157000000 | 1.330922000000  | 0.593655000000  |
| Br | -0.540670000000 | -2.420705000000 | -0.722856000000 |
| Br | 1.696750000000  | 0.121771000000  | 1.953403000000  |

**[CfBr<sub>3</sub>]**

|    | X               | Y               | Z               |
|----|-----------------|-----------------|-----------------|
| Cf | -0.070474000000 | -0.051313000000 | 0.110027000000  |
| Br | -2.213423000000 | 1.416107000000  | 0.554828000000  |
| Br | -0.533531000000 | -2.473138000000 | -0.824562000000 |
| Br | 1.790809000000  | 0.177902000000  | 1.963565000000  |

**[EsBr<sub>3</sub>]**

|    | X               | Y               | Z               |
|----|-----------------|-----------------|-----------------|
| Es | -1.033967000000 | -0.029211000000 | -0.130251000000 |
| Br | -1.945548000000 | 2.156499000000  | 1.033704000000  |
| Br | -0.416597000000 | 0.025529000000  | -2.695200000000 |
| Br | -1.848994000000 | -2.300604000000 | 0.934238000000  |

**[FmBr<sub>3</sub>]**

|    | X               | Y               | Z               |
|----|-----------------|-----------------|-----------------|
| Fm | -0.043314000000 | -0.013810000000 | 0.056066000000  |
| Br | -2.226150000000 | 1.368531000000  | 0.597345000000  |
| Br | -0.549272000000 | -2.478119000000 | -0.748543000000 |
| Br | 1.746209000000  | 0.126085000000  | 1.991588000000  |

**[MdBr<sub>3</sub>]**

|    | X               | Y               | Z               |
|----|-----------------|-----------------|-----------------|
| Md | 0.103885000000  | 0.347887000000  | -0.045416000000 |
| Br | -2.319337000000 | 1.345902000000  | 0.423974000000  |
| Br | 0.856041000000  | -0.169488000000 | -2.555386000000 |
| Br | 1.899122000000  | 0.015217000000  | 1.901028000000  |

**[NoBr<sub>3</sub>]**

|    | X               | Y               | Z               |
|----|-----------------|-----------------|-----------------|
| No | -0.128775000000 | -0.139549000000 | -0.585538000000 |
| Br | -2.295003000000 | 1.359908000000  | -0.027025000000 |
| Br | -0.342928000000 | -2.823824000000 | -0.619970000000 |
| Br | 2.084639000000  | 1.033316000000  | -1.574717000000 |

**[LrBr<sub>3</sub>]**

|    | X               | Y               | Z              |
|----|-----------------|-----------------|----------------|
| Lr | 0.000000000000  | 0.000000000000  | 0.080273000000 |
| Br | -1.258908000000 | 2.180492000000  | 0.649819000000 |
| Br | -1.258908000000 | -2.180492000000 | 0.649819000000 |
| Br | 2.517816000000  | 0.000000000000  | 0.649819000000 |

**[AcI<sub>3</sub>]**

|    | X               | Y               | Z              |
|----|-----------------|-----------------|----------------|
| Ac | 0.000000000000  | 0.000000000000  | 0.465259000000 |
| I  | -1.482379000000 | -2.567556000000 | 1.188478000000 |
| I  | 2.964758000000  | 0.000000000000  | 1.188478000000 |
| I  | -1.482379000000 | 2.567556000000  | 1.188478000000 |

**[ThI<sub>3</sub>]**

|    | X               | Y               | Z               |
|----|-----------------|-----------------|-----------------|
| Th | -0.697086000000 | -1.029960000000 | 0.063726000000  |
| I  | -3.536249000000 | -1.715225000000 | 0.370668000000  |
| I  | 0.705220000000  | -1.667123000000 | -2.436662000000 |
| I  | 0.739671000000  | 0.292340000000  | 2.257287000000  |

**[PaI<sub>3</sub>]**

|    | X               | Y               | Z               |
|----|-----------------|-----------------|-----------------|
| Pa | -0.513104000000 | 0.478730000000  | 0.099622000000  |
| I  | 0.210415000000  | -2.022803000000 | -1.206667000000 |
| I  | -3.340125000000 | 1.176248000000  | 0.007668000000  |
| I  | 0.836734000000  | 1.014771000000  | 2.625375000000  |



**[U<sub>3</sub>]**

|   | X               | Y               | Z               |
|---|-----------------|-----------------|-----------------|
| U | -0.534420000000 | 0.485384000000  | -0.592547000000 |
| I | -3.203216000000 | -0.435125000000 | 0.084344000000  |
| I | 1.419642000000  | -1.234168000000 | 0.692716000000  |
| I | -0.178434000000 | 0.368020000000  | -3.470302000000 |

**[Np<sub>3</sub>]**

|    | X               | Y               | Z               |
|----|-----------------|-----------------|-----------------|
| Np | -0.724713000000 | -1.076633000000 | 0.122917000000  |
| I  | -3.278075000000 | -2.316591000000 | -0.434359000000 |
| I  | 1.382968000000  | -2.976915000000 | -0.437711000000 |
| I  | -0.614727000000 | -0.312096000000 | 2.907033000000  |

**[Pu<sub>3</sub>]**

|    | X               | Y               | Z               |
|----|-----------------|-----------------|-----------------|
| Pu | -1.269600000000 | -0.079700000000 | 0.147500000000  |
| I  | -1.542200000000 | -2.891300000000 | -0.476000000000 |
| I  | 0.804900000000  | 1.225400000000  | -1.389000000000 |
| I  | -3.787700000000 | 1.342800000000  | 0.083300000000  |

**[Am<sub>3</sub>]**

|    | X               | Y               | Z               |
|----|-----------------|-----------------|-----------------|
| Am | -0.339556000000 | -1.629778000000 | -0.395464000000 |
| I  | -1.020510000000 | -1.075880000000 | -3.173370000000 |
| I  | 2.490803000000  | -1.382645000000 | 0.236467000000  |
| I  | -1.863257000000 | -3.840476000000 | 0.728305000000  |

**[Cm<sub>3</sub>]**

|    | X               | Y               | Z               |
|----|-----------------|-----------------|-----------------|
| Cm | -0.678142000000 | -0.621515000000 | -0.743512000000 |
| I  | -3.266690000000 | -1.171588000000 | 0.348505000000  |
| I  | 1.372351000000  | -2.143959000000 | 0.550237000000  |
| I  | -0.632684000000 | -1.000410000000 | -3.581716000000 |

**[Bk<sub>3</sub>]**

|    | X               | Y               | Z               |
|----|-----------------|-----------------|-----------------|
| Bk | -0.020185000000 | 0.002266000000  | 0.020251000000  |
| I  | -2.390414000000 | 1.468171000000  | 0.636822000000  |
| I  | -0.598848000000 | -2.667161000000 | -0.814439000000 |
| I  | 1.885670000000  | 0.144603000000  | 2.145582000000  |

**[Cf<sub>3</sub>]**

|    | X               | Y               | Z               |
|----|-----------------|-----------------|-----------------|
| Cf | -0.158615000000 | -0.159467000000 | 0.263772000000  |
| I  | -2.444330000000 | 1.520602000000  | 0.696248000000  |
| I  | -0.619743000000 | -2.772767000000 | -0.833700000000 |
| I  | 1.910247000000  | 0.165652000000  | 2.230608000000  |

**[EsI<sub>3</sub>]**

|    | X               | Y               | Z               |
|----|-----------------|-----------------|-----------------|
| Es | -1.672311000000 | -0.038110000000 | -0.445409000000 |
| I  | -2.034789000000 | 2.275753000000  | 1.212657000000  |
| I  | -0.295501000000 | 0.039453000000  | -2.978001000000 |
| I  | -1.929352000000 | -2.431823000000 | 1.116000000000  |

**[FmI<sub>3</sub>]**

|    | X               | Y               | Z               |
|----|-----------------|-----------------|-----------------|
| Fm | -0.287102000000 | -0.278582000000 | 0.520539000000  |
| I  | -2.442047000000 | 1.654165000000  | 0.484274000000  |
| I  | -0.527855000000 | -2.712057000000 | -1.029395000000 |
| I  | 2.096196000000  | 0.235483000000  | 2.081301000000  |

**[MdI<sub>3</sub>]**

|    | X               | Y              | Z               |
|----|-----------------|----------------|-----------------|
| Md | 0.064613000000  | 0.196639000000 | -0.036223000000 |
| I  | -2.391239000000 | 1.682326000000 | 0.446643000000  |
| I  | 0.980870000000  | 0.051449000000 | -2.794007000000 |
| I  | 2.092714000000  | 0.265806000000 | 2.049367000000  |

**[NoI<sub>3</sub>]**

|    | X               | Y               | Z               |
|----|-----------------|-----------------|-----------------|
| No | -0.149780000000 | -0.141521000000 | -0.643291000000 |
| I  | -2.482675000000 | 1.500631000000  | 0.054113000000  |
| I  | -0.350647000000 | -3.071177000000 | -0.593418000000 |
| I  | 2.298098000000  | 1.142427000000  | -1.635354000000 |

**[LrI<sub>3</sub>]**

|    | X               | Y               | Z              |
|----|-----------------|-----------------|----------------|
| Lr | 0.000000000000  | 0.000000000000  | 0.270533000000 |
| I  | -1.385919000000 | 2.400482000000  | 0.677515000000 |
| I  | -1.385919000000 | -2.400482000000 | 0.677515000000 |
| I  | 2.771838000000  | 0.000000000000  | 0.677515000000 |

**[AcAt<sub>3</sub>]**

|  | X | Y | Z |
|--|---|---|---|
|--|---|---|---|

|    |                 |                 |                |
|----|-----------------|-----------------|----------------|
| Ac | 0.000000000000  | 0.000000000000  | 0.439881000000 |
| At | -1.531705000000 | -2.652990000000 | 1.243252000000 |
| At | 3.063409000000  | 0.000000000000  | 1.243252000000 |
| At | -1.531705000000 | 2.652990000000  | 1.243252000000 |

**[ThAt<sub>3</sub>]**

|    | X               | Y               | Z               |
|----|-----------------|-----------------|-----------------|
| Th | -0.696367000000 | -1.030994000000 | 0.064085000000  |
| At | -3.646848000000 | -1.741464000000 | 0.382468000000  |
| At | 0.759465000000  | -1.691818000000 | -2.534752000000 |
| At | 0.795246000000  | 0.344435000000  | 2.343163000000  |

**[PaAt<sub>3</sub>]**

|    | X               | Y               | Z               |
|----|-----------------|-----------------|-----------------|
| Pa | -0.505929000000 | 0.493632000000  | 0.087349000000  |
| At | 0.234753000000  | -2.120855000000 | -1.249800000000 |
| At | -3.450381000000 | 1.197066000000  | 0.007348000000  |
| At | 0.886251000000  | 1.028484000000  | 2.724457000000  |

**[UAt<sub>3</sub>]**

|    | X               | Y               | Z               |
|----|-----------------|-----------------|-----------------|
| U  | -0.529721000000 | 0.516596000000  | -0.583112000000 |
| At | -3.301004000000 | -0.460517000000 | 0.112721000000  |
| At | 1.493381000000  | -1.289409000000 | 0.744621000000  |
| At | -0.164329000000 | 0.373249000000  | -3.576001000000 |

**[NpAt<sub>3</sub>]**

|    | X               | Y               | Z               |
|----|-----------------|-----------------|-----------------|
| Np | -0.727234000000 | -1.095641000000 | 0.137486000000  |
| At | -3.392659000000 | -2.373118000000 | -0.456059000000 |
| At | 1.477484000000  | -3.063337000000 | -0.460000000000 |
| At | -0.610590000000 | -0.281046000000 | 3.033035000000  |

**[PuAt<sub>3</sub>]**

|    | X               | Y               | Z               |
|----|-----------------|-----------------|-----------------|
| Pu | -1.226147000000 | -0.075388000000 | 0.281824000000  |
| At | -1.566391000000 | -2.949796000000 | -0.546266000000 |
| At | 0.826035000000  | 1.249821000000  | -1.477203000000 |
| At | -3.854897000000 | 1.369256000000  | 0.023304000000  |

**[AmAt<sub>3</sub>]**

|    | X               | Y               | Z               |
|----|-----------------|-----------------|-----------------|
| Am | -0.383882000000 | -1.546025000000 | -0.350219000000 |

|    |                 |                 |                 |
|----|-----------------|-----------------|-----------------|
| At | -1.037317000000 | -1.052306000000 | -3.284837000000 |
| At | 2.593480000000  | -1.401134000000 | 0.268816000000  |
| At | -1.890318000000 | -3.935044000000 | 0.785858000000  |

**[CmAt<sub>3</sub>]**

|    | X               | Y               | Z               |
|----|-----------------|-----------------|-----------------|
| Cm | -0.678524000000 | -0.622971000000 | -0.742292000000 |
| At | -3.372698000000 | -1.202810000000 | 0.389627000000  |
| At | 1.453061000000  | -2.214233000000 | 0.599630000000  |
| At | -0.633135000000 | -1.025489000000 | -3.694582000000 |

**[BkAt<sub>3</sub>]**

|    | X               | Y               | Z               |
|----|-----------------|-----------------|-----------------|
| Bk | -0.011574000000 | 0.012783000000  | -0.003845000000 |
| At | -2.491999000000 | 1.512030000000  | 0.691944000000  |
| At | -0.625275000000 | -2.789018000000 | -0.813969000000 |
| At | 1.937526000000  | 0.126930000000  | 2.249482000000  |

**[CfAt<sub>3</sub>]**

|    | X               | Y               | Z               |
|----|-----------------|-----------------|-----------------|
| Cf | -0.171009000000 | -0.176052000000 | 0.294802000000  |
| At | -2.593346000000 | 1.536240000000  | 0.780458000000  |
| At | -0.683842000000 | -2.928851000000 | -0.803553000000 |
| At | 1.969517000000  | 0.122059000000  | 2.390342000000  |

**[EsAt<sub>3</sub>]**

|    | X               | Y               | Z               |
|----|-----------------|-----------------|-----------------|
| Es | -1.427822000000 | -0.036391000000 | -0.282427000000 |
| At | -2.478307000000 | 2.479700000000  | 1.003520000000  |
| At | -0.750008000000 | 0.035440000000  | -3.224998000000 |
| At | -2.364847000000 | -2.646527000000 | 0.899649000000  |

**[FmAt<sub>3</sub>]**

|    | X               | Y               | Z               |
|----|-----------------|-----------------|-----------------|
| Fm | -0.315513000000 | -0.314984000000 | 0.578557000000  |
| At | -2.556626000000 | 1.723409000000  | 0.517812000000  |
| At | -0.559281000000 | -2.845602000000 | -1.069211000000 |
| At | 2.188452000000  | 0.243750000000  | 2.190230000000  |

**[MdAt<sub>3</sub>]**

|    | X               | Y              | Z               |
|----|-----------------|----------------|-----------------|
| Md | 0.077372000000  | 0.220383000000 | -0.040959000000 |
| At | -2.459104000000 | 1.827047000000 | 0.458350000000  |

|    |                |                |                 |
|----|----------------|----------------|-----------------|
| At | 1.047285000000 | 0.128524000000 | -2.921931000000 |
| At | 2.204122000000 | 0.353926000000 | 2.129748000000  |

**[NoAt<sub>3</sub>]**

|    | X               | Y               | Z               |
|----|-----------------|-----------------|-----------------|
| No | -0.161909000000 | -0.142655000000 | -0.677365000000 |
| At | -2.589188000000 | 1.580315000000  | 0.102976000000  |
| At | -0.354906000000 | -3.212453000000 | -0.575581000000 |
| At | 2.420987000000  | 1.204867000000  | -1.667552000000 |

**[LrAt<sub>3</sub>]**

|    | X               | Y               | Z              |
|----|-----------------|-----------------|----------------|
| Lr | 0.000000000000  | 0.000000000000  | 0.410146000000 |
| At | -1.455340000000 | 2.520723000000  | 0.680377000000 |
| At | -1.455340000000 | -2.520723000000 | 0.680377000000 |
| At | 2.910680000000  | 0.000000000000  | 0.680377000000 |

**[AcPO<sub>4</sub>]**

|    | X               | Y               | Z               |
|----|-----------------|-----------------|-----------------|
| P  | 0.000000000000  | 0.000000000000  | -0.575201000000 |
| O  | -1.407084000000 | 0.000000000000  | -1.411244000000 |
| O  | 0.703542000000  | 1.218570000000  | -1.411244000000 |
| O  | 0.703542000000  | -1.218570000000 | -1.411244000000 |
| O  | 0.000000000000  | 0.000000000000  | 0.893828000000  |
| Ac | 0.000000000000  | 0.000000000000  | -3.192083000000 |

**[ThPO<sub>4</sub>]**

|    | X               | Y               | Z               |
|----|-----------------|-----------------|-----------------|
| P  | 0.152240000000  | -1.186032000000 | 0.247439000000  |
| O  | -1.390151000000 | -1.568883000000 | -0.167051000000 |
| O  | 0.595743000000  | -0.846483000000 | -1.297179000000 |
| O  | 0.672580000000  | -2.741906000000 | 0.167204000000  |
| O  | 0.471304000000  | -0.305781000000 | 1.370421000000  |
| Th | -0.409380000000 | -2.738273000000 | -1.732045000000 |

**[PaPO<sub>4</sub>]**

|    | X               | Y               | Z               |
|----|-----------------|-----------------|-----------------|
| P  | 0.136682000000  | -1.231507000000 | 0.194327000000  |
| O  | -1.406337000000 | -1.609886000000 | -0.218627000000 |
| O  | 0.581612000000  | -0.886319000000 | -1.350140000000 |
| O  | 0.658715000000  | -2.783569000000 | 0.117222000000  |
| O  | 0.455791000000  | -0.347635000000 | 1.314352000000  |
| Pa | -0.419064000000 | -2.763583000000 | -1.768234000000 |

**[UPO<sub>4</sub>]**

|   | X               | Y               | Z               |
|---|-----------------|-----------------|-----------------|
| P | 0.135420000000  | -1.232785000000 | 0.184833000000  |
| O | -1.410836000000 | -1.608592000000 | -0.218315000000 |
| O | 0.584122000000  | -0.881445000000 | -1.350700000000 |
| O | 0.661319000000  | -2.787731000000 | 0.117906000000  |
| O | 0.454320000000  | -0.353465000000 | 1.310619000000  |
| U | -0.416945000000 | -2.758481000000 | -1.755542000000 |

**[NpPO<sub>4</sub>]**

|    | X               | Y               | Z               |
|----|-----------------|-----------------|-----------------|
| P  | 0.132348000000  | -1.242430000000 | 0.188015000000  |
| O  | -1.412618000000 | -1.609668000000 | -0.215856000000 |
| O  | 0.584218000000  | -0.884314000000 | -1.351548000000 |
| O  | 0.661960000000  | -2.788609000000 | 0.120694000000  |
| O  | 0.453731000000  | -0.354205000000 | 1.307737000000  |
| Np | -0.412340000000 | -2.743373000000 | -1.760242000000 |

**[PuPO<sub>4</sub>]**

|    | X               | Y               | Z               |
|----|-----------------|-----------------|-----------------|
| P  | 0.200015000000  | -1.052928000000 | 0.419111000000  |
| O  | -1.344862000000 | -1.419076000000 | 0.022320000000  |
| O  | 0.652575000000  | -0.695940000000 | -1.115430000000 |
| O  | 0.731945000000  | -2.599827000000 | 0.358662000000  |
| O  | 0.520281000000  | -0.170307000000 | 1.544890000000  |
| Pu | -0.347262000000 | -2.565725000000 | -1.513379000000 |

**[AmPO<sub>4</sub>]**

|    | X               | Y               | Z               |
|----|-----------------|-----------------|-----------------|
| P  | 0.128456000000  | -1.264680000000 | 0.196733000000  |
| O  | -1.417203000000 | -1.586715000000 | -0.199389000000 |
| O  | 0.571062000000  | -0.902506000000 | -1.367208000000 |
| O  | 0.674184000000  | -2.787356000000 | 0.135153000000  |
| O  | 0.473072000000  | -0.351804000000 | 1.292422000000  |
| Am | -0.422272000000 | -2.729538000000 | -1.768910000000 |

**[CmPO<sub>4</sub>]**

|    | X               | Y               | Z               |
|----|-----------------|-----------------|-----------------|
| P  | 0.158920000000  | -1.184909000000 | 0.248909000000  |
| O  | -1.395787000000 | -1.541124000000 | -0.131138000000 |
| O  | 0.606719000000  | -0.822025000000 | -1.286170000000 |
| O  | 0.683813000000  | -2.737298000000 | 0.192640000000  |
| O  | 0.490943000000  | -0.303635000000 | 1.373190000000  |
| Cm | -0.405776000000 | -2.684520000000 | -1.663285000000 |

**[BkPO<sub>4</sub>]**

|    | X               | Y               | Z               |
|----|-----------------|-----------------|-----------------|
| P  | 0.138050000000  | -1.241825000000 | 0.169804000000  |
| O  | -1.416947000000 | -1.602416000000 | -0.208158000000 |
| O  | 0.585892000000  | -0.877800000000 | -1.360932000000 |
| O  | 0.658975000000  | -2.797286000000 | 0.114663000000  |
| O  | 0.467882000000  | -0.364602000000 | 1.298158000000  |
| Bk | -0.426352000000 | -2.738771000000 | -1.724736000000 |

**[CfPO<sub>4</sub>]**

|    | X               | Y               | Z               |
|----|-----------------|-----------------|-----------------|
| P  | 0.167344000000  | -1.157426000000 | 0.257594000000  |
| O  | -1.385909000000 | -1.529144000000 | -0.108862000000 |
| O  | 0.619103000000  | -0.794281000000 | -1.258075000000 |
| O  | 0.681336000000  | -2.720818000000 | 0.206599000000  |
| O  | 0.496496000000  | -0.292142000000 | 1.396978000000  |
| Cf | -0.397914000000 | -2.669832000000 | -1.619677000000 |

**[EsPO<sub>4</sub>]**

|    | X               | Y               | Z               |
|----|-----------------|-----------------|-----------------|
| P  | 0.138059000000  | -1.236742000000 | 0.163564000000  |
| O  | -1.411221000000 | -1.602539000000 | -0.206134000000 |
| O  | 0.588683000000  | -0.873717000000 | -1.354184000000 |
| O  | 0.655432000000  | -2.791701000000 | 0.112260000000  |
| O  | 0.465808000000  | -0.367608000000 | 1.300780000000  |
| Es | -0.429162000000 | -2.750492000000 | -1.727387000000 |

**[FmPO<sub>4</sub>]**

|    | X               | Y               | Z               |
|----|-----------------|-----------------|-----------------|
| P  | 0.158060000000  | -1.188945000000 | 0.247666000000  |
| O  | -1.388972000000 | -1.536479000000 | -0.123856000000 |
| O  | 0.606800000000  | -0.820348000000 | -1.274435000000 |
| O  | 0.683487000000  | -2.727598000000 | 0.199921000000  |
| O  | 0.490763000000  | -0.302616000000 | 1.370668000000  |
| Fm | -0.406115000000 | -2.684557000000 | -1.668917000000 |

**[MdPO<sub>4</sub>]**

|   | X               | Y               | Z               |
|---|-----------------|-----------------|-----------------|
| P | 0.000000000000  | 0.000000000000  | -0.602388000000 |
| O | -1.398161000000 | 0.000000000000  | -1.419034000000 |
| O | 0.699081000000  | 1.210843000000  | -1.419034000000 |
| O | 0.699081000000  | -1.210843000000 | -1.419034000000 |
| O | 0.000000000000  | 0.000000000000  | 0.874114000000  |

Md 0.000000000000 0.000000000000 -3.107645000000

**[NoPO<sub>4</sub>]**

|    | X               | Y               | Z               |
|----|-----------------|-----------------|-----------------|
| P  | 0.097165000000  | 0.000000000000  | 0.434903000000  |
| O  | -0.627607000000 | -1.171489000000 | -0.433501000000 |
| O  | -0.627607000000 | 1.171490000000  | -0.433500000000 |
| O  | 1.529040000000  | 0.000001000000  | -0.284026000000 |
| O  | -0.008173000000 | 0.000000000000  | 1.902534000000  |
| No | 0.286626000000  | -0.000001000000 | -2.125655000000 |

**[LrPO<sub>4</sub>]**

|    | X               | Y               | Z               |
|----|-----------------|-----------------|-----------------|
| P  | 0.000000000000  | 0.000000000000  | -0.427859000000 |
| O  | -1.409660000000 | 0.000000000000  | -1.285493000000 |
| O  | 0.704830000000  | 1.220801000000  | -1.285493000000 |
| O  | 0.704830000000  | -1.220801000000 | -1.285493000000 |
| O  | 0.000000000000  | 0.000000000000  | 1.039172000000  |
| Lr | 0.000000000000  | 0.000000000000  | -2.847542000000 |

**[AcAsO<sub>4</sub>]**

|    | X               | Y               | Z               |
|----|-----------------|-----------------|-----------------|
| As | 0.000000000000  | 0.000000000000  | -0.431009000000 |
| O  | -1.503307000000 | 0.000000000000  | -1.449728000000 |
| O  | 0.751654000000  | 1.301902000000  | -1.449728000000 |
| O  | 0.751654000000  | -1.301902000000 | -1.449728000000 |
| O  | 0.000000000000  | 0.000000000000  | 1.198962000000  |
| Ac | 0.000000000000  | 0.000000000000  | -3.166596000000 |

**[UAsO<sub>4</sub>]**

|    | X               | Y               | Z               |
|----|-----------------|-----------------|-----------------|
| As | 0.179974000000  | -1.108246000000 | 0.345295000000  |
| O  | -1.497832000000 | -1.588535000000 | -0.186685000000 |
| O  | 0.630940000000  | -0.811405000000 | -1.395631000000 |
| O  | 0.712452000000  | -2.846640000000 | 0.172046000000  |
| O  | 0.536248000000  | -0.132370000000 | 1.594594000000  |
| U  | -0.395953000000 | -2.700884000000 | -1.684493000000 |

**[NpAsO<sub>4</sub>]**

|    | X               | Y               | Z               |
|----|-----------------|-----------------|-----------------|
| As | 0.204711000000  | -1.039891000000 | 0.436160000000  |
| O  | -1.471762000000 | -1.517909000000 | -0.093670000000 |
| O  | 0.655620000000  | -0.745123000000 | -1.304626000000 |
| O  | 0.737895000000  | -2.773880000000 | 0.264171000000  |



|    |                 |                 |                 |
|----|-----------------|-----------------|-----------------|
| O  | 0.563966000000  | -0.055681000000 | 1.681116000000  |
| Np | -0.368957000000 | -2.626373000000 | -1.590340000000 |

**[PuAsO<sub>4</sub>]**

|    | X               | Y               | Z               |
|----|-----------------|-----------------|-----------------|
| As | 0.216754000000  | -0.999518000000 | 0.484178000000  |
| O  | -1.456603000000 | -1.471981000000 | -0.040503000000 |
| O  | 0.671032000000  | -0.705454000000 | -1.255040000000 |
| O  | 0.754288000000  | -2.730953000000 | 0.311622000000  |
| O  | 0.580695000000  | -0.024537000000 | 1.736487000000  |
| Pu | -0.353641000000 | -2.585156000000 | -1.536846000000 |

**[AmAsO<sub>4</sub>]**

|    | X               | Y               | Z               |
|----|-----------------|-----------------|-----------------|
| As | 0.175684000000  | -1.136976000000 | 0.347798000000  |
| O  | -1.502901000000 | -1.566905000000 | -0.168318000000 |
| O  | 0.608197000000  | -0.856480000000 | -1.431005000000 |
| O  | 0.726284000000  | -2.843267000000 | 0.190941000000  |
| O  | 0.568491000000  | -0.105109000000 | 1.544878000000  |
| Am | -0.410713000000 | -2.698111000000 | -1.689060000000 |

**[CmAsO<sub>4</sub>]**

|    | X               | Y               | Z               |
|----|-----------------|-----------------|-----------------|
| As | 0.177191000000  | -1.133919000000 | 0.313123000000  |
| O  | -1.510234000000 | -1.595051000000 | -0.195378000000 |
| O  | 0.624563000000  | -0.828569000000 | -1.426717000000 |
| O  | 0.706828000000  | -2.870270000000 | 0.149785000000  |
| O  | 0.548904000000  | -0.157953000000 | 1.561962000000  |
| Cm | -0.412804000000 | -2.703482000000 | -1.687612000000 |

**[BkAsO<sub>4</sub>]**

|    | X               | Y               | Z               |
|----|-----------------|-----------------|-----------------|
| As | 0.181282000000  | -1.123179000000 | 0.324638000000  |
| O  | -1.505609000000 | -1.586219000000 | -0.182483000000 |
| O  | 0.629353000000  | -0.815658000000 | -1.413497000000 |
| O  | 0.708251000000  | -2.860283000000 | 0.161840000000  |
| O  | 0.552085000000  | -0.150734000000 | 1.576455000000  |
| Bk | -0.404883000000 | -2.682750000000 | -1.660633000000 |

**[CfAsO<sub>4</sub>]**

|    | X               | Y               | Z               |
|----|-----------------|-----------------|-----------------|
| As | 0.185265000000  | -1.105787000000 | 0.329361000000  |
| O  | -1.496880000000 | -1.583030000000 | -0.173226000000 |
| O  | 0.637547000000  | -0.797156000000 | -1.390100000000 |

|    |                 |                 |                 |
|----|-----------------|-----------------|-----------------|
| O  | 0.699530000000  | -2.853835000000 | 0.155530000000  |
| O  | 0.554908000000  | -0.159148000000 | 1.602998000000  |
| Cf | -0.404103000000 | -2.682065000000 | -1.656257000000 |

**[EsAsO<sub>4</sub>]**

|    | X               | Y               | Z               |
|----|-----------------|-----------------|-----------------|
| As | 0.141638000000  | -1.224630000000 | 0.181231000000  |
| O  | -1.538594000000 | -1.695309000000 | -0.322457000000 |
| O  | 0.593882000000  | -0.915158000000 | -1.540299000000 |
| O  | 0.661261000000  | -2.965394000000 | 0.010316000000  |
| O  | 0.505382000000  | -0.273244000000 | 1.452987000000  |
| Es | -0.449354000000 | -2.804113000000 | -1.811295000000 |

**[FmAsO<sub>4</sub>]**

|    | X               | Y               | Z               |
|----|-----------------|-----------------|-----------------|
| As | 0.175406000000  | -1.138670000000 | 0.309970000000  |
| O  | -1.504178000000 | -1.596941000000 | -0.192770000000 |
| O  | 0.622980000000  | -0.832722000000 | -1.418652000000 |
| O  | 0.702980000000  | -2.864677000000 | 0.151285000000  |
| O  | 0.549706000000  | -0.154915000000 | 1.553652000000  |
| Fm | -0.416364000000 | -2.713780000000 | -1.701719000000 |

**[MdAsO<sub>4</sub>]**

|    | X               | Y               | Z               |
|----|-----------------|-----------------|-----------------|
| As | 0.189610000000  | -1.100091000000 | 0.345719000000  |
| O  | -1.491403000000 | -1.590714000000 | -0.105402000000 |
| O  | 0.645368000000  | -0.793036000000 | -1.366419000000 |
| O  | 0.686510000000  | -2.839618000000 | 0.226332000000  |
| O  | 0.566373000000  | -0.117337000000 | 1.591530000000  |
| Md | -0.407840000000 | -2.692348000000 | -1.677532000000 |

**[NoAsO<sub>4</sub>]**

|    | X               | Y               | Z               |
|----|-----------------|-----------------|-----------------|
| As | 0.113514000000  | -0.000005000000 | 0.508691000000  |
| O  | -0.708360000000 | -1.219319000000 | -0.565123000000 |
| O  | -0.708348000000 | 1.219312000000  | -0.565128000000 |
| O  | 1.645153000000  | 0.000000000000  | -0.370065000000 |
| O  | -0.032199000000 | 0.000016000000  | 2.133278000000  |
| No | 0.309936000000  | 0.000001000000  | -2.183455000000 |

**[LrAsO<sub>4</sub>]**

|    | X               | Y               | Z               |
|----|-----------------|-----------------|-----------------|
| As | 0.191138000000  | -1.096312000000 | 0.361199000000  |
| O  | -1.508745000000 | -1.558160000000 | -0.147838000000 |

|    |                 |                 |                 |
|----|-----------------|-----------------|-----------------|
| O  | 0.643985000000  | -0.785302000000 | -1.388584000000 |
| O  | 0.726651000000  | -2.843603000000 | 0.200733000000  |
| O  | 0.562388000000  | -0.121014000000 | 1.609267000000  |
| Lr | -0.382511000000 | -2.624299000000 | -1.586791000000 |
